# Supplementary material for: Anthropogenic Secondary Organic Aerosols Contribute Substantially to Air Pollution Mortality
Source: Copernicus journal article supplement (doi:10.5194/acp-2020-914), 2020-11-11
Supplement: Supplementary file 1 [file acp-2020-914-supplement.zip]

1 **Supplemental Information for:**  
2 **Anthropogenic Secondary Organic Aerosols Contribute Substantially to Air Pollution**  
3 **Mortality**  
4  
5 Benjamin A. Nault et al.  
6  
7 Correspondence: Jose L. Jimenez (jose.jimenez@colorado.edu)

## 8 Section S1 US Emission Inventories

### 9 *Anthropogenic VOC emissions*

10 The US emissions of VOCs is based on a mass balance estimate of the petrochemical  
11 industry reported by McDonald et al. (2018). Briefly, fuel sales and chemical product use are  
12 estimated from publicly available reports on energy use, chemical production, economic surveys,  
13 and freight shipments. Mobile source emission factors are from prior work quantifying both  
14 on-road and off-road engines (McDonald et al., 2013, 2015). Evaporative sources of  
15 transportation fuels are considered in addition to tailpipe exhaust (Pierson et al., 1999). VCP  
16 emission factors are based on literature values, including from the indoor environment, and  
17 reported in McDonald et al. (2018). Other fossil energy sources of VOCs, such as from oil  
18 refineries and industry, are taken from official inventories reported by the California Air  
19 Resources Board (CARB, 2013) or US Environmental Protection Agency (NEI, 2015).  
20 McDonald et al. (2018) reported fossil-VOC emissions for the Los Angeles basin in the year  
21 2010.

22

### 23 *Speciation of VOC emissions*

24 The total VOC emissions are speciated to estimate BTEX and IVOC emissions from  
25 petrochemical VOC sources. Briefly, gasoline and diesel exhaust, gasoline fuel, and headspace  
26 vapors are based on profiles reported in the literature from the Caldecott Tunnel (Gentner et al.,  
27 2012, 2013). Speciation profiles of VCPs are based on California Air Resources Board surveys  
28 of architectural coatings (Davis, 2007) and consumer products (CCPR, 2015). Other industrial

29 solvent uses and point/area source emissions are from the EPA SPECIATE (v4.4) database (EPA,  
30 2014).

31

### 32 *Extrapolating IVOC/BTEX ratios from 2010 Los Angeles to other field campaigns*

33 In the ASOA mass closure estimation, three separate field campaigns are utilized from  
34 the US: NEAQS 2002 (Boston/New York City), CalNex 2010 (Los Angeles), and WINTER  
35 2015 (New York City outflow). These field campaigns span two megacities (Los Angeles and  
36 New York City), ~one decade, and two seasons (summer versus winter). Here, we discuss how  
37 each of these variables could affect the IVOC/BTEX emissions ratio. We focus the discussion on  
38 mobile sources and VCPs because these are the dominant contributors to BTEX and IVOCs.

39 The IVOC/BTEX emissions ratio could be affected by the population density of a city. It  
40 is well-established that per capita transportation fuel use decreases with increasing population  
41 density (Gately et al., 2015), whereas VCP usage is expected to scale with population. Relative  
42 to Los Angeles, the per capita fuel use in New York City is ~2 times lower (Gately et al., 2015),  
43 resulting in lower on-road transportation VOC emissions relative to VCPs. Because aromatics  
44 are mainly found in gasoline, whereas the IVOCs have a higher contribution from VCPs, the  
45 IVOC/BTEX ratio is expected to be higher in New York City than Los Angeles.

46 To assess impacts of annual trends on the IVOC/BTEX ratio, we utilize long-term trend  
47 analyses of mobile source VOC emissions in Los Angeles (McDonald et al., 2013, 2015; Hassler  
48 et al., 2016). The main effect is that on-road gasoline emissions have decreased with time, both  
49 from the tailpipe of vehicles (McDonald et al., 2013) and of gasoline-related VOCs in ambient  
50 air measurements (Warneke et al., 2012). We utilize the EPA Trends Report to scale VOC

emissions for other anthropogenic sectors, including VCPs and industrial sources (<https://www.epa.gov/air-emissions-inventories/air-pollutant-emissions-trends-data>). The EPA Trends Report suggests that VCP (or solvent) emissions decreased by ~30% between 2002 and 2010, including efforts to reduce the VOC content of architectural coatings (Matheson, 2002). After 2010, the emissions have been slightly increasing, likely due to population growth. Because both mobile sources and VCP emissions are decreasing with time, the IVOC/BTEX emissions ratio is not significantly altered.

Lastly, the effects of seasonality influence on-road transportation emissions through: (i) increased VOC emissions in winter relative to summer from cold-starting engines, and (ii) lower evaporative emissions due to colder ambient temperatures. We estimate that exhaust emissions from passenger vehicles increases by ~50% due to higher cold-start emissions in winter relative to summer based on the EPA MOVES model (MOVES, 2015). Evaporated gasoline and headspace vapors are known to exhibit a temperature-dependence (Rubin et al., 2006), and estimated to be ~20% and ~80% lower, respectively, based on typical wintertime temperatures of New York City relative to summertime Los Angeles. Due to compensating factors between cold-start engines and evaporated fuels, the IVOC/BTEX emissions are not significantly affected by seasonality.

Overall, when taking into account differences in population density between Los Angeles and New York City, trends of mobile source and VCP emissions over time, and seasonality, the IVOC/BTEX emission ratios range between ~2.3 to 2.7, which is relatively small. This sensitivity analysis helps explain why the enhancement observed in SOA scales with BTEX levels in the urban atmosphere.

73

## 74 **Section S2 Beijing Emission Inventory**

### 75 *Anthropogenic VOC emissions*

76 The total VOC emissions of Beijing were developed following the bottom-up framework  
77 of the Multi-resolution Emission Inventory for China (MEIC) model (available at  
78 <http://www.meicmodel.org>), based on a technology-based methodology. The details of activity  
79 rates, emission factors, technology distribution, and control measures configured in the MEIC  
80 model are summarized in a series of papers (Zhang et al., 2009; Zheng et al., 2014, 2018; Liu et  
81 al., 2015; Li et al., 2017, 2019).

82 In the MEIC model, a detailed four-level source classification system, representing  
83 sector, fuel/product, technology/solvent type, and end-of-pipe pollutant abatement facilities, was  
84 established by including over 700 emitting sources for each province. All anthropogenic sources,  
85 including power plants, industrial sources, volatile chemical products, fossil fuel burning in  
86 residential stoves, transportation were all considered.

87 Power plants are treated as point sources in the MEIC model. The VOC emissions were  
88 derived from the China coal-fired Power Plant Emissions Database (CPED, (Liu et al., 2015)),  
89 which is developed based on information of each unit on fuel type, fuel quality, combustion  
90 technology, etc.

91 Volatile chemical products are comprised of solvent use applied for architecture, vehicles,  
92 wood, and other industrial purposes, glue use, printing, pesticide use, and domestic solvent use.  
93 The market share of waterborne and solvent-based paint is further taken into account for each  
94 source category. For the on-road transportation sector, the improved emissions developed by

95 Zheng et al. (2014) were integrated into the framework of MEIC, which estimated the vehicle  
96 population and emission factors at a county level. Both the VOC emissions in running mode and  
97 evaporation were considered. Emission standards covering pre-Euro I and Euro I to Euro V in  
98 Beijing were applied for each vehicle type (Zheng et al., 2018; Li et al., 2019). Regarding  
99 oxygenated volatile organic compounds (OVOCs), the emission factors for on-road vehicles  
100 were corrected, as current emission factors are only for non-methane hydrocarbons (NMHC).  
101 Correction ratios of 1.32, 1.08, 1.10, and 1.06 were applied for heavy-duty and light-duty diesel  
102 vehicles, and heavy-duty and light-duty gasoline vehicles, respectively, to the original values to  
103 comply with the follow-up speciation for the total VOC, following the method of Li et al. (2014,  
104 2019).

105

#### 106 *Speciation of VOC emissions*

107 Emissions by individual chemical species were developed based on the  
108 profile-assignment approach (Li et al., 2014, 2019). First, a “composite” profile database for  
109 China was established by integrating the local profiles and supplementing it with the SPECIATE  
110 v4.5 database for absent sources ((Simon et al., 2010), available at:  
111 <https://www.epa.gov/air-emissions-modeling/speciate-version-45-through-40>). The detailed  
112 procedure for developing the composite profile database is illustrated in Li et al. (2014). In brief,  
113 for sources where there are significant differences in technology or legislation between China  
114 and western countries, only local profiles are used; otherwise, all candidate profiles are included  
115 for further compilation in the composite profile database. Local profiles covering most of the  
116 important sources were gathered and reviewed, including biofuel combustion, coal combustion,

117 asphalt production, oil production, refinery, paint use, gasoline evaporation, gasoline vehicle  
118 exhaust, diesel vehicles, and so on, as detailed illustrated in Li et al. (2019).

119 Then, profiles for all combustion-related sources, including fossil fuel combustion in  
120 power plants, industry, residential, and transportation sectors were reviewed, and incomplete  
121 profiles that were absent from the OVOC fractions were corrected by appending the component  
122 of “OVOC” with fractions derived from the “complete” profiles for the same source. After  
123 OVOC correction, all “candidate” profiles were averaged by species to establish the composite  
124 profile database. Finally, the composite profile to each source was assigned by setting up the  
125 source linkage between the profile database and the inventory. Emissions by individual chemical  
126 species for each source were then further developed.

127

### 128 **Section S3 London/United Kingdom Emission Inventory**

#### 129 *Anthropogenic VOC emissions*

130 The National Atmospheric Emissions Inventory (NAEI) estimates UK emissions of  
131 VOCs from anthropogenic sources following methods in the EMEP/EEA Emissions Inventory  
132 Guidebook (EMEP/EEA, 2016) for submission under the revised EU Directive 2016/2284/EU on  
133 National Emissions Ceilings (NECD), available at:  
134 <https://eur-lex.europa.eu/legal-content/EN/TXT/PDF/?uri=CELEX:32016L2284&from=EN>, and  
135 the United Nations Economic Commission for Europe (UNECE) Convention on Long-Range  
136 Transboundary Air Pollution (CLRTAP), available at:  
137 [http://www.ceip.at/ms/ceip\\_home1/ceip\\_home/reporting\\_instructions/reporting\\_programme/](http://www.ceip.at/ms/ceip_home1/ceip_home/reporting_instructions/reporting_programme/).  
138 The NECD and CLRTAP define those VOC sources to be included and excluded from the

139 national inventory (for example, emissions of NMVOCs from biogenic sources are not included).  
140 The Guidebook provides estimation methodologies and default emission factors for each source  
141 category, although countries can use country-specific emission factors where these are deemed  
142 relevant. The NAEI currently covers organic emissions from around 400 individual source  
143 categories, with a large contribution from a diverse range of industrial processes and solvents,  
144 but with very few individually dominant sources. The inventory then speciates emissions into  
145 ~650 individual compounds, or groups of compounds. Groupings of organics, for example,  
146 expressed as ‘sum of all C14 compounds,’ make up a substantial fraction of IVOC emissions,  
147 rather than being reported as individual compounds.

148 Emissions from the use of solvents and other volatile chemicals in industry and in  
149 consumer products, fuel production and distribution, food and drink manufacture and other  
150 non-combustion industrial processes accounted for 72% of all UK NMVOC emissions in 2017,  
151 according to the NAEI. Both the solvent and industrial process sectors cover a diverse range of  
152 emission source categories: the NAEI identifies 136 separate categories across the two sectors

153 For the road transport sector, the NAEI reports exhaust emissions of NMVOCs and its  
154 emissions from evaporative losses of fuel vapor from petrol vehicles. Emissions from re-fueling  
155 at filling stations are reported separately under the fugitive emissions from the fuel distribution  
156 sector. The method used for road transport in the NAEI follows the method in the European  
157 COPERT 5 model and described in the EMEP/EEA Emissions Inventory Guidebook. The  
158 method uses average speed-related emission factors for hot exhaust emissions of total  
159 hydrocarbons for detailed vehicle categories (vehicle type, weight and/or engine size) and Euro  
160 standards for petrol cars, diesel cars, petrol and diesel light goods vehicles, rigid and articulated



161 HGVs, buses and coaches, and mopeds and motorcycles, and combines these with detailed traffic  
162 and fleet activity data derived from information provided by DfT. Separate estimates are made of  
163 methane emissions for each vehicle type and subtracted from the THC emissions to derive the  
164 NMVOC emissions.

165         Evaporative emissions from vehicles are estimated in the NAEI, using the Guidebook  
166 method for three different processes: diurnal losses, hot soak, and running losses. Emissions are  
167 dependent on ambient temperature and fuel vapor pressure and different factors are provided for  
168 vehicles with and without carbon canisters for evaporative emission controls. All vehicles from  
169 Euro 1 onwards are fitted with these devices; so, evaporative emission have been decreasing  
170 from the early 1990s with the penetration of these vehicles in the fleet. The method also takes  
171 into account the reduction in Reid Vapour Petrol of petrol sold in the UK since 2000, as required  
172 for compliance with the EU Fuel Quality Directive 98/70/EC, amended by Directive  
173 2009/30/EC.

174

#### 175         *Speciation of VOC emissions*

176         The NAEI is considered to adequately reflect annual real world emissions of BTEX (see,  
177 for example, eddy covariance flux comparisons in London by Langford et al. (2010) and Vaughn  
178 et al. (2017)); so, those values are taken directly from the NAEI and used here. IVOCs, and  
179 particularly long chain hydrocarbons, are included in many cases in the inventory as groups, but  
180 their emissions are known to be significantly underestimated when compared against field  
181 observations. We use the observations of Dunmore et al. (2015), made in wintertime central  
182 London in 2012, as guide to uprate NAEI emissions for IVOC species based on the estimated

183 discrepancies between inventory and field observation reported for each carbon number above  
184 C10. This leads to some significant multipliers being applied to the inventory values, sometimes  
185 of the order 60 to 70. We assume that the same multipliers apply to all sources, since field data  
186 does not provide any means to attribute different factors to road transport IVOCs compared with  
187 IVOCs from VCP sources.

188         Since the NAEI represents a reporting of emissions for the purposes of compliance with  
189 international treaties, some fraction of those emissions are not released on the mainland UK. For  
190 this paper, offshore BTEX and IVOC emissions, arising for example from offshore oil and gas  
191 activity, aircraft in cruise, or shipping and emissions associated with overseas Crown  
192 Dependencies are removed from the UK total, since they play no part in determining the  
193 chemical environment of London. The annual NAEI totals are then divided equally to give a  
194 daily national emission.

195

#### 196 **S4 Ozone Sensitivity to ASOA Simulations**

197         A potential issue in the attribution of premature mortality to AOSA is that reducing  
198 emissions that lead to ASOA is that this may impact ozone concentrations. A sensitivity analysis  
199 was conducted, where the ASOA emissions were reduced by 20% (Fig. S12). In general, there is  
200 a less than 1% reduction in total ozone concentration in the boundary layer. This is due to the  
201 fact that the most important AVOCs that contribute to ozone formation are light alkenes (e.g.,  
202 ethylene and propylene, Fig. 5), which are not ASOA precursors. Though the reaction rate  
203 constant of the ASOA precursors is generally high (Table S11), the concentration of the  
204 precursors is low and they thus account for a low percentage of the total ozone production

205 potential (Table S5 through Table S9). For example, the measured OH reactivity (Sect. 3) for two  
206 different urban regions was between 15 to 25 s<sup>-1</sup> (Griffith et al., 2016; Whalley et al., 2016)  
207 while the OH reactivity for the ASOA precursors for the same region was between 2 to 4 s<sup>-1</sup>. The  
208 small contribution to the OH reactivity is in line to the minimal impact to the ozone  
209 concentration observed in Fig. S12.

## Supporting Information Tables

**Table S1.** List of instruments whose observations are used in this study. In some cases  $\Delta\text{SOA}/\Delta\text{CO}$  (Table S4), SOA versus  $\text{O}_x$  slope (Table S4), or VOC emission ratios (Table S5 through Table S8) had already been reported, and, in those cases, we use the previous literature reports in our analyses.

| Location                    | SOA                     | $\text{O}_x$                    | HCHO                                                          | PAN                 | VOCs                                     | CO                               |
|-----------------------------|-------------------------|---------------------------------|---------------------------------------------------------------|---------------------|------------------------------------------|----------------------------------|
| Houston, TX, USA (2000)     | Q-AMS <sup>a</sup>      | CL & UV Absorption <sup>b</sup> | DOAS <sup>c</sup>                                             | GC-ECD <sup>d</sup> | GC-FID, GC-MS <sup>e</sup>               | Infrared Absorption <sup>f</sup> |
| Mexico City, Mexico (2006)  | HR-ToF-AMS <sup>g</sup> | CL <sup>h</sup>                 | TDLAS <sup>i</sup>                                            | CIMS <sup>j</sup>   | WAS <sup>k</sup>                         | UV RF <sup>l</sup>               |
| Los Angeles, CA, USA (2010) | HR-ToF-AMS <sup>g</sup> | CL & UV Absorption <sup>m</sup> | Average of DOAS <sup>c</sup> & Hantzsch Reaction <sup>n</sup> | GC-ECD <sup>d</sup> | GC-MS <sup>o</sup>                       | UV RF <sup>l</sup>               |
| Beijing, China (2011)       | HR-ToF-AMS <sup>g</sup> | CL & UV Absorption <sup>p</sup> | PTR-MS <sup>q</sup>                                           | GC-ECD <sup>r</sup> | GC-FID <sup>s</sup>                      | IR Absorption <sup>p</sup>       |
| London, UK (2012)           | C-ToF-AMS <sup>t</sup>  | CL & UV Absorption <sup>u</sup> | Hantzsch Reaction <sup>n</sup>                                | GC-ECD <sup>v</sup> | GC-FID & GC $\times$ GC-FID <sup>w</sup> | UV RF <sup>l</sup>               |
| Houston, TX, USA (2013)     | HR-ToF-AMS <sup>g</sup> | CL <sup>x</sup>                 | Average of LIF <sup>y</sup> & CAMS <sup>z</sup>               | CIMS <sup>j</sup>   | WAS <sup>k</sup>                         | DACOM <sup>aa</sup>              |
| Seoul, South Korea (2016)   | HR-ToF-AMS <sup>g</sup> | CL <sup>h</sup>                 | CAMS <sup>z</sup>                                             | CIMS <sup>j</sup>   | WAS <sup>k</sup>                         | DACOM <sup>aa</sup>              |

<sup>a</sup>Quadrupole Aerosol Mass Spectrometer (Q-AMS) (Jayne et al., 2000)

<sup>b</sup>Chemiluminescence (CL) and UV Absorption (Williams et al., 1997)

<sup>c</sup>Differential Optical Absorption Spectrometry (DOAS) (Stutz and Platt, 1996, 1997)

<sup>d</sup>Gas chromatography-electron capture detector (GC-ECD) (Williams et al., 2000; Roberts et al., 2002)

<sup>e</sup>Gas chromatography-flame ionization detector (GC-FID) and gas chromatography mass spectrometer (Roberts et al., 2001)

<sup>f</sup>TECO Model 48s IR gas-filter

<sup>g</sup>High Resolution Time-of-Flight Aerosol Mass Spectrometer (HR-ToF-AMS) (DeCarlo et al., 2006)

<sup>h</sup>Chemiluminescence (CL) and UV Absorption (Weinheimer et al., 1994)

<sup>i</sup>Tunable diode laser absorption spectroscopic (TDLAS) measurements (Fried et al., 2003)

<sup>j</sup>Chemical ionization mass spectrometer (CIMS) (Huey L Tanner D Slusher D Dibb J Arimoto R Chen G Davis D Buhr M Nowak J Mauldin R Eisele F, 2004; Slusher et al., 2004; Kim et al., 2007)

<sup>k</sup>Whole air sample, followed by analysis with GC-FID and/or GC-MS (Blake et al., 2003)

<sup>l</sup>UV Resonance Fluorescence (RF) (Gerbig et al., 1999)

233 <sup>m</sup>Chemiluminescence (CL) and UV Absorption (Hayes et al., 2013)  
 234 <sup>n</sup>Hantzsch reaction (Cárdenas et al., 2000)  
 235 <sup>o</sup>Gas chromatograph mass spectrometer (Gilman et al., 2010)  
 236 <sup>p</sup>Chemiluminescence (CL), UV Absorption, and IR Absorption (Hu et al., 2016)  
 237 <sup>q</sup>Proton transfer reaction mass spectrometer (PTR-MS) (Warneke et al., 2011)  
 238 <sup>r</sup>Gas chromatography electron capture detector (GC-ECD) (Zhang et al., 2017)  
 239 <sup>s</sup>Gas chromatography flame ionization detector (GC-FID) (Wang et al., 2014)  
 240 <sup>t</sup>Compact Time-of-Flight Aerosol Mass Spectrometer (C-ToF-AMS) (Drewnick et al., 2005)  
 241 <sup>u</sup>Chemiluminescence (CL) and UV Absorption (Whalley et al., 2016)  
 242 <sup>v</sup>Gas chromatography electron capture detector (GC-ECD) (Whalley et al., 2016)  
 243 <sup>w</sup>Gas chromatography flame ionization detector (GC-FID) (Dunmore et al., 2015)  
 244 <sup>x</sup>Chemiluminescence (CL) (Ryerson et al., 1999; Pollack et al., 2010)  
 245 <sup>y</sup>Laser induced fluorescence (LIF) (Cazorla et al., 2015)  
 246 <sup>z</sup>Compact Atmospheric Multi-species Spectrometer (CAMS) difference frequency absorption  
 247 spectrometer (Weibring et al., 2010)  
 248 <sup>aa</sup>Tunable diode laser absorption spectroscopy (Sachse et al., 1987)

249 **Table S2.** Concentrations of PM<sub>1</sub> components shown in Fig. 1. References for the measurements  
 250 can be found in Table 1.

| Dataset Location              | Average Concentration ( $\mu\text{g sm}^{-3}$ ) of submicron aerosol under standard temperature and pressure |     |                 |                 |                 |
|-------------------------------|--------------------------------------------------------------------------------------------------------------|-----|-----------------|-----------------|-----------------|
|                               | SOA                                                                                                          | HOA | SO <sub>4</sub> | NO <sub>3</sub> | NH <sub>4</sub> |
| Houston, TX, USA (2000)       | 2.7                                                                                                          | 0.7 | 4.9             | 0.4             | 1.5             |
| Northeast USA (2002)          | 4.9                                                                                                          | 0.5 | 2.0             | 0.3             | 0.7             |
| Tokyo, Japan (2004)           | 6.0                                                                                                          | 1.5 | 4.4             | 0.9             | 4.0             |
| Mexico City, Mexico (2006)    | 11.2                                                                                                         | 4.8 | 1.9             | 6.0             | 2.5             |
| Paris, France (2009)          | 1.9                                                                                                          | 1.1 | 1.2             | 0.5             | 0.6             |
| Los Angeles, CA, USA (2010)   | 5.0                                                                                                          | 2.0 | 2.9             | 3.6             | 2.1             |
| Changdao Island, China (2011) | 9.4                                                                                                          | 4.4 | 8.3             | 12.2            | 6.5             |
| Beijing, China (2011)         | 17.1                                                                                                         | 8.9 | 22.0            | 16.8            | 13.7            |
| London, UK (2012)             | 2.7                                                                                                          | 1.6 | 1.4             | 2.7             | 1.3             |
| Houston, TX, USA (2013)       | 3.7                                                                                                          | 0.0 | 2.7             | 0.1             | 0.6             |
| New York City, NY, USA (2015) | 0.8                                                                                                          | 0.7 | 1.2             | 1.4             | 0.4             |
| Seoul, South Korea (2016)     | 11.9                                                                                                         | 1.3 | 5.0             | 7.9             | 4.4             |

251

252

**Table S3.** Table summarizing the results of recent GEOS-Chem performance evaluations for modeling BSOA.

| Study                             | Observed Data                                                          | Species                                 | Details                                                                                                                                     |
|-----------------------------------|------------------------------------------------------------------------|-----------------------------------------|---------------------------------------------------------------------------------------------------------------------------------------------|
| Fisher et al. (2016) <sup>a</sup> | SEAC <sup>4</sup> RS, below 1 km (spatial pattern), below 500 m (bias) | Isoprene                                | Spatial patterns well captured, and biases are +34% for isoprene and +3% for monoterpenes                                                   |
|                                   |                                                                        | Monoterpene                             |                                                                                                                                             |
|                                   |                                                                        | Organic Nitrates from Isoprene          | Spatial patterns well captured, and biases are -0.6% for first- and -35% for second-generation isoprene nitrates                            |
|                                   | SEAC <sup>4</sup> RS, 0 - 4 km vertical profiles                       | Isoprene                                | Agreed well but GEOS-Chem somewhat overestimated observed concentrations near 1km                                                           |
|                                   |                                                                        | Monoterpene                             |                                                                                                                                             |
|                                   |                                                                        | HCHO                                    |                                                                                                                                             |
|                                   | SOAS, at the surface                                                   | Organic Nitrates from Isoprene          | Agreed within measurement uncertainties                                                                                                     |
|                                   |                                                                        | Isoprene                                | Underestimated isoprene and monoterpenes (-28% and -54%), but overestimated first- and second- generation isoprene nitrates (+85% and +43%) |
|                                   |                                                                        | Monoterpene                             |                                                                                                                                             |
|                                   |                                                                        | HCHO                                    |                                                                                                                                             |
|                                   |                                                                        | Organic Nitrates from Isoprene          |                                                                                                                                             |
| Travis et al. (2016)              | SEAC <sup>4</sup> RS, 0 - 12 km                                        | First Generation from Isoprene Nitrates | Good agreement for ISOPOOH and ISOPN, underestimation of HPALDs by a factor of two                                                          |
|                                   |                                                                        | ISOPOOH                                 |                                                                                                                                             |
|                                   |                                                                        | HPALDS                                  |                                                                                                                                             |
| Marais et al. (2016)              | SOAS, at the surface                                                   | IEPOX-SOA                               | Good agreement for isoprene derived aerosols, mean concentrations were almost the same                                                      |
|                                   |                                                                        | ISOPOOH-SOA                             |                                                                                                                                             |
|                                   | SEAC <sup>4</sup> RS, below 2 km (spatial pattern)                     | IEPOX-SOA                               | Spatial patterns well captured                                                                                                              |

<sup>a</sup>This study decreased isoprene emissions by 15% and doubled monoterpene emissions of MEGANv2.1.

257 **Table S3 cont.**

| Study                             | Observed Data                                                            | Species                               | Details                                                               |
|-----------------------------------|--------------------------------------------------------------------------|---------------------------------------|-----------------------------------------------------------------------|
| Kaiser et al. (2018) <sup>a</sup> | SEAC <sup>4</sup> RS                                                     | Isoprene                              | All were overestimated, except for first generation isoprene nitrates |
|                                   |                                                                          | HCHO                                  |                                                                       |
|                                   |                                                                          | ISOPOOH                               |                                                                       |
|                                   |                                                                          | MVK + MACR                            |                                                                       |
|                                   |                                                                          | First Generation Isoprene Nitrates    |                                                                       |
| Pai et al. (2020)                 | 15 airborne campaigns (SEAC <sup>4</sup> RS, GoAmazon, SENEX, OP3, etc.) | OA under biogenic dominant conditions | Slight overestimation, but generally very similar in magnitude        |

258 <sup>a</sup>NEI NO<sub>x</sub> emissions other than power plants decreased by 60%, soil NO<sub>x</sub> emissions were  
259 reduced by 50% across the Midwestern US. With the decrease of NO<sub>x</sub> emissions, ISOPOOH  
260 concentrations were increased in GEOS-Chem.



**Table S4.** Dilution-corrected SOA concentrations at 0.5 equivalent days and slopes of SOA versus O<sub>x</sub>, HCHO, and PAN used in Fig. 4 and Fig. 5. References for the values can be found either in Table 1 or found in Fig. S2 through Fig. S4. Uncertainty is 1σ, and either represents propagation in uncertainty in measurements (see Sect. 2 Main Paper) for ΔSOA/ΔCO or uncertainty in slopes for SOA versus the three photochemical species.

| Dataset Location                 | ΔSOA/ΔCO at<br>0.5 eq. days            | SOA vs. O <sub>x</sub><br>Slopes | SOA vs. HCHO<br>Slopes | SOA vs. PAN<br>Slopes |
|----------------------------------|----------------------------------------|----------------------------------|------------------------|-----------------------|
| Houston, TX, USA<br>(2000)       |                                        | 0.04±0.01 <sup>a</sup>           | 0.32±0.08              | 1.41±0.46             |
| Northeast USA<br>(2002)          | 16±3 <sup>b</sup><br>48±9 <sup>c</sup> |                                  |                        |                       |
| Mexico City,<br>Mexico (2003)    |                                        | 0.14±0.01 <sup>a</sup>           |                        |                       |
| Tokyo, Japan (2004)              |                                        | 0.19±0.01 <sup>a</sup>           |                        |                       |
| Mexico City,<br>Mexico (2006)    | 58±10                                  | 0.16±0.01                        | 1.60±0.06              | 5.60±0.30             |
| Paris, France (2009)             |                                        | 0.14±0.01 <sup>a</sup>           |                        |                       |
| Pasadena, CA, USA<br>(2010)      | 59±11                                  | 0.16±0.01                        | 1.93±0.02              | 5.41±0.12             |
| Changdao Island,<br>China (2011) | 23±4                                   |                                  |                        |                       |
| Beijing, China<br>(2011)         | 31±6                                   | 0.21±0.01                        | 3.90±0.15              | 7.42±0.46             |
| London, UK (2012)                | 54±10                                  | 0.13±0.01                        | 0.36±0.02              | 3.37±0.41             |
| Houston, TX, USA<br>(2013)       |                                        | 0.16±0.01                        | 1.52±0.13              | 6.92±0.58             |
| New York City, NY,<br>USA (2015) | 33±6                                   |                                  |                        |                       |
| Seoul, South Korea<br>(2016)     | 107±19                                 | 0.29±0.02                        | 3.73±0.26              | 10.13±0.52            |

<sup>a</sup>Missing reported uncertainty; therefore, assuming ±0.01, as that is typical for other campaigns

<sup>b</sup>From de Gouw et al. (2005). <sup>c</sup>From Kleinman et al. (2007).

268 **Table S5.** Emission ratios of BTEX aromatics used in this study. If no reference is listed, then  
 269 the emission ratio was calculated using Eq. 3.

| Dataset<br>Location                 | Emission Ratios (ppbv aromatic/ppmv CO) |         |              |            |          | References                            |
|-------------------------------------|-----------------------------------------|---------|--------------|------------|----------|---------------------------------------|
|                                     | Benzene                                 | Toluene | Ethylbenzene | m+p-xylene | o-xylene |                                       |
| Houston, TX,<br>USA (2000)          | 2.6                                     | 3.5     | 0.6          | 2.8        | 0.8      |                                       |
| NE USA, Ship<br>(2002)              | 0.9                                     | 2.0     | 0.2          | 0.6        | 0.3      | Baker et al.<br>(2008)                |
| NE USA,<br>Aircraft (2002)          | 0.8                                     | 2.9     | 0.4          | 1.2        | 0.5      | Warneke et<br>al. (2007)              |
| Mexico City,<br>Mexico (2006)       | 0.9                                     | 7.5     | 0.9          | 1.1        | 0.4      | Apel et al.<br>(2010)                 |
| Los Angeles,<br>CA, USA (2010)      | 1.3                                     | 3.4     | 0.6          | 2.1        | 0.8      | de Gouw et<br>al. (2017)              |
| Changdao<br>Island, China<br>(2011) | 2.3                                     | 1.9     | 0.5          | 1.3        | 0.4      | Yuan et al.<br>(2013)                 |
| Beijing, China<br>(2011)            | 1.2                                     | 2.4     | 1.0          | 1.6        | 0.6      | Wang et al.<br>(2014)                 |
| London, UK<br>(2012)                | 1.8                                     | 6.3     | 1.2          | 2.2        | 1.1      |                                       |
| Houston, TX,<br>USA (2013)          | 2.3                                     | 3.0     | 0.6          | 3.9        | 1.2      |                                       |
| New York City,<br>NY, USA (2015)    | 0.8                                     | 2.9     | 0.4          | 1.2        | 0.5      | Warneke et<br>al. (2007) <sup>a</sup> |
| Seoul, South<br>Korea (2016)        | 1.1                                     | 13.1    | 2.4          | 3.3        | 2.3      |                                       |

270 <sup>a</sup>Using the emissions from Warneke et al. (2007) instead of Schroder et al. (2018) as Schroder et  
 271 al. found significant uncertainty in the emissions calculated from observations.

272 **Table S6.** Emission ratios of alkanes used in this study. If no reference is listed, then the  
 273 emission ratio was calculated using Eq. 3.

| Dataset<br>Location              | Emission Ratios (ppbv alkane/ppmv CO) |         |          |          |           |           |          | References               |
|----------------------------------|---------------------------------------|---------|----------|----------|-----------|-----------|----------|--------------------------|
|                                  | Ethane                                | Propane | n-Butane | i-Butane | n-Pentane | i-Pentane | n-Hexane |                          |
| Houston, TX,<br>USA (2000)       | 40.9                                  | 24.3    | 9.0      | 14.7     | 3.1       | 10.0      | 3.1      |                          |
| NE USA, Ship<br>(2002)           | 8.3                                   | 2.3     | 1.8      | 1.3      | 1.0       | 2.8       | 0.9      | Baker et al.<br>(2008)   |
| NE USA,<br>Aircraft (2002)       | 9.9                                   | 9.0     | 2.4      | 1.3      | 2.0       | 5.4       | 0.6      | Warneke et<br>al. (2007) |
| Mexico City,<br>Mexico (2006)    | 7.4                                   | 41.5    | 15.1     | 4.8      | 2.1       | 2.7       | 1.5      | Apel et al.<br>(2010)    |
| Los Angeles,<br>CA, USA (2010)   | 16.5                                  | 13.4    | 5.0      | 3.2      | 3.4       | 8.7       | 1.4      | de Gouw et<br>al. (2017) |
| Changdao Island,<br>China (2011) | 7.7                                   | 4.5     | 2.5      | 1.2      | 1.0       | 1.5       | 0.5      | Yuan et al.<br>(2013)    |
| Beijing, China<br>(2011)         | 4.3                                   | 3.9     | 2.5      | 2.5      | 1.2       | 2.0       | 0.6      | Wang et al.<br>(2014)    |
| London, UK<br>(2012)             | 33.0                                  | 17.8    | 17.3     | 8.4      | 4.6       | 11.3      | 1.3      |                          |
| Houston, TX,<br>USA (2013)       | 86.5                                  | 37.3    | 14.6     | 10.6     | 7.0       | 10.5      | 3.0      |                          |
| Seoul, South<br>Korea (2016)     | 16.1                                  | 0.4     | 6.0      | 3.4      | 3.1       | 3.7       | 1.7      |                          |

274

275 **Table S7.** Emission ratios of alkenes used in this study. If no reference is listed, then the  
 276 emission ratio was calculated using Eq. 3.

| Dataset Location              | Emission Ratios (ppbv alkene/ppmv CO) |         | References            |
|-------------------------------|---------------------------------------|---------|-----------------------|
|                               | Ethene                                | Propene |                       |
| Houston, TX, USA (2000)       | 24.4                                  | 28.4    |                       |
| NE USA, Ship (2002)           | 4.4                                   | 1.1     | Baker et al. (2008)   |
| NE USA, Aircraft (2002)       | 4.9                                   | 1.4     | Warneke et al. (2007) |
| Mexico City, Mexico (2006)    | 8.4                                   | 2.6     | Apel et al. (2010)    |
| Los Angeles, CA, USA (2010)   | 11.2                                  | 4.1     | de Gouw et al. (2017) |
| Changdao Island, China (2011) | 5.3                                   | 1.4     | Yuan et al. (2013)    |
| Beijing, China (2011)         | 4.4                                   | 1.4     | Wang et al. (2014)    |
| London, UK (2012)             | 10.3                                  | 6.2     |                       |
| Houston, TX, USA (2013)       | 12.0                                  | 15.8    |                       |
| Seoul, South Korea (2016)     | 5.4                                   | 2.1     |                       |

277

278 **Table S8.** Emission ratios of non-BTEX aromatics used in this study. If no reference is listed,  
 279 then the emission ratio was calculated using Eq. 3.

| Dataset<br>Location              | Emission Ratios (ppbv aromatic/ppmv CO) |               |               | References               |
|----------------------------------|-----------------------------------------|---------------|---------------|--------------------------|
|                                  | Trimethylbenzenes                       | Ethyltoluenes | Propylbenzene |                          |
| NE USA,<br>Aircraft (2002)       | 0.71                                    | 0.58          | 0.14          | Warneke et al.<br>(2007) |
| Los Angeles,<br>CA, USA (2010)   | 1.47                                    | 0.56          | 0.13          | de Gouw et<br>al.(2017)  |
| Beijing, China<br>(2011)         | 0.57                                    | 0.41          | 0.09          | Wang et al.<br>(2014)    |
| London, UK<br>(2012)             | 0.49                                    | 0.23          | 0.58          |                          |
| New York City,<br>NY, USA (2015) | 0.71                                    | 0.58          | 0.14          | Warneke et al.<br>(2007) |

280

281

282 **Table S9.** Normalized mass concentration of primary organic aerosol (POA) measured in various  
 283 campaigns, used to determine SVOC emission ratios.

| Dataset Location                 | Normalized Mass Concentration ( $\mu\text{g sm}^{-3}$ ) |           | References             |
|----------------------------------|---------------------------------------------------------|-----------|------------------------|
|                                  | HOA                                                     | Other POA |                        |
| NE USA (2002)                    | 12.2                                                    | -         | de Gouw et al. (2005)  |
| Los Angeles, CA,<br>USA (2010)   | 5.3                                                     | 7.7       | Hayes et al. (2013)    |
| Beijing, China (2011)            | 6.1                                                     | 9.9       | Hu et al. (2016)       |
| London, UK (2012)                | 17.9                                                    | 14.1      | Young et al. (2015)    |
| New York City, NY,<br>USA (2015) | 5.6                                                     | 14.4      | Schroder et al. (2018) |

284

285 **Table S10.** Sensitivity analysis of slopes and  $R^2$  by removing one city each. All slopes are  
 286 statistically similar at the 95% confidence interval.

| Dataset Location        | Slope ( $\mu\text{g sm}^{-3} \text{ s}$ ) | $R^2$ |
|-------------------------|-------------------------------------------|-------|
| All                     | 24.8 $\pm$ 3.4                            | 0.88  |
| Without Seoul           | 34.0 $\pm$ 10.5                           | 0.64  |
| Without NYC             | 24.8 $\pm$ 3.8                            | 0.8   |
| Without London          | 24.2 $\pm$ 3.4                            | 0.90  |
| Without Beijing         | 24.2 $\pm$ 3.5                            | 0.89  |
| Without Chinese Outflow | 24.0 $\pm$ 3.6                            | 0.88  |
| Without LA              | 24.2 $\pm$ 3.3                            | 0.90  |
| Without Mexico City     | 24.2 $\pm$ 3.4                            | 0.90  |
| Without NE US Aircraft  | 24.8 $\pm$ 2.9                            | 0.92  |
| Without NE US, Boat     | 24.2 $\pm$ 4.0                            | 0.86  |

287

288 **Table S11.** Rate constants used throughout this study.

| Compound                         | Rate Constant<br>(cm <sup>3</sup> molec. <sup>-1</sup> s <sup>-1</sup> ) | References               |
|----------------------------------|--------------------------------------------------------------------------|--------------------------|
| <i>Alkanes</i>                   |                                                                          |                          |
| Ethane                           | $6.9 \times 10^{-12} \times \exp(-1000/T)$                               | Atkinson et al. (2006)   |
| Propane                          | $7.6 \times 10^{-12} \times \exp(-585/T)$                                | Atkinson et al. (2006)   |
| n-Butane                         | $9.8 \times 10^{-12} \times \exp(-425/T)$                                | Atkinson et al. (2006)   |
| i-Butane                         | $1.17 \times 10^{-17} \times T^2 \times \exp(213/T)$                     | Atkinson and Arey (2003) |
| n-Pentane                        | $2.52 \times 10^{-17} \times T^2 \times \exp(158/T)$                     | Atkinson and Arey (2003) |
| i-Pentane                        | $3.6 \times 10^{-12}$                                                    | Atkinson and Arey (2003) |
| n-Hexane                         | $2.54 \times 10^{-14} \times T \times \exp(-112/T)$                      | Atkinson and Arey (2003) |
| <i>Alkenes</i>                   |                                                                          |                          |
| Ethene                           | $7.84 \times 10^{-12,a}$                                                 | Atkinson et al. (2006)   |
| Propene                          | $2.86 \times 10^{-11,a}$                                                 | Atkinson et al. (2006)   |
| <i>Aromatics</i>                 |                                                                          |                          |
| Benzene                          | $2.3 \times 10^{-12} \times \exp(-190/T)$                                | Atkinson et al. (2006)   |
| Toluene                          | $1.8 \times 10^{-12} \times \exp(340/T)$                                 | Atkinson et al. (2006)   |
| Ethylbenzene                     | $7 \times 10^{-12}$                                                      | Atkinson and Arey (2003) |
| m+p-xylene                       | $1.87 \times 10^{-11,b}$                                                 | Atkinson and Arey (2003) |
| o-xylene                         | $1.36 \times 10^{-11}$                                                   | Atkinson and Arey (2003) |
| Trimethylbenzenes                | $2.73 \times 10^{-12} \times \exp(730/T)$                                | Bohn and Zetzsch (2012)  |
| Ethyltoluenes                    | $1.2 \times 10^{-11}$                                                    | Atkinson and Arey (2003) |
| Propylbenzene                    | $5.8 \times 10^{-12}$                                                    | Atkinson and Arey (2003) |
| NO <sub>x</sub> /NO <sub>y</sub> |                                                                          |                          |
| OH + NO <sub>2</sub>             | $1.23 \times 10^{-11,a}$                                                 | Mollner et al. (2010)    |

289 <sup>a</sup>Showing the rate constant at 298 K, 1013 hPa. However, for this study, we used the temperature  
290 and pressure dependent formulation listed in each respective reference.

291 <sup>b</sup>This is the average of m-xylene and p-xylene rate constants.

292 **Table S12.** Table of GBD parameters, which is the mean of the draw values (see associated file)  
 293 from the IHME website:  
 294 [http://ghdx.healthdata.org/record/global-burden-disease-study-2010-gbd-2010-ambient-air-pollut](http://ghdx.healthdata.org/record/global-burden-disease-study-2010-gbd-2010-ambient-air-pollution-risk-model-1990-2010)  
 295 [ion-risk-model-1990-2010](http://ghdx.healthdata.org/record/global-burden-disease-study-2010-gbd-2010-ambient-air-pollution-risk-model-1990-2010).

| Parameter                   | IHD     | Stroke  | COPD    | LC       | ALRI     |
|-----------------------------|---------|---------|---------|----------|----------|
| $\alpha$                    | 1.4273  | 1.2641  | 15.224  | 114.74   | 2.2023   |
| $\beta$                     | 0.04764 | 0.00722 | 0.00095 | 0.000141 | 0.000284 |
| $\rho$                      | 0.376   | 1.314   | 0.684   | 0.741    | 1.183    |
| PM <sub>2.5,Threshold</sub> | 7.462   | 7.387   | 7.374   | 7.380    | 7.283    |

296



297 **Table S13.** Table of GEMM parameters. The GEMM parameters are from Burnett et al. (2018),  
 298 with the Chinese male cohort.

| Cause of Death | Age Range (years) | $\theta$ | Standard Error $\theta$ | $\alpha$ | $\mu$ | $\pi$ |
|----------------|-------------------|----------|-------------------------|----------|-------|-------|
| NCD + LRI      | >25               | 0.1430   | 0.01807                 | 1.6      | 15.5  | 36.8  |
|                | 27.5              | 0.1585   | 0.01477                 | 1.6      | 15.5  | 36.8  |
|                | 32.5              | 0.1577   | 0.01470                 | 1.6      | 15.5  | 36.8  |
|                | 37.5              | 0.1570   | 0.01463                 | 1.6      | 15.5  | 36.8  |
|                | 42.5              | 0.1558   | 0.01450                 | 1.6      | 15.5  | 36.8  |
|                | 47.5              | 0.1532   | 0.01425                 | 1.6      | 15.5  | 36.8  |
|                | 52.5              | 0.1499   | 0.01394                 | 1.6      | 15.5  | 36.8  |
|                | 57.5              | 0.1462   | 0.01361                 | 1.6      | 15.5  | 36.8  |
|                | 62.5              | 0.1421   | 0.01325                 | 1.6      | 15.5  | 36.8  |
|                | 67.5              | 0.1374   | 0.01284                 | 1.6      | 15.5  | 36.8  |
|                | 72.5              | 0.1319   | 0.01234                 | 1.6      | 15.5  | 36.8  |
|                | 77.5              | 0.1253   | 0.01174                 | 1.6      | 15.5  | 36.8  |
|                | 85                | 0.1141   | 0.01071                 | 1.6      | 15.5  | 36.8  |
|                | >25               | 0.2969   | 0.01787                 | 1.9      | 12    | 40.2  |
| IHD            | 27.5              | 0.5070   | 0.02458                 | 1.9      | 12    | 40.2  |
|                | 32.5              | 0.4762   | 0.02309                 | 1.9      | 12    | 40.2  |
|                | 37.5              | 0.4455   | 0.02160                 | 1.9      | 12    | 40.2  |
|                | 42.5              | 0.4148   | 0.02011                 | 1.9      | 12    | 40.2  |
|                | 47.5              | 0.3841   | 0.01862                 | 1.9      | 12    | 40.2  |
|                | 52.5              | 0.3533   | 0.01713                 | 1.9      | 12    | 40.2  |
|                | 57.5              | 0.3226   | 0.01564                 | 1.9      | 12    | 40.2  |
|                | 62.5              | 0.2919   | 0.01415                 | 1.9      | 12    | 40.2  |

300 **Table 13 cont.**

| <b>Cause of Death</b> | <b>Age Range (years)</b> | <b><math>\theta</math></b> | <b>Standard Error <math>\theta</math></b> | <b><math>\alpha</math></b> | <b><math>\mu</math></b> | <b><math>\pi</math></b> |
|-----------------------|--------------------------|----------------------------|-------------------------------------------|----------------------------|-------------------------|-------------------------|
| IHD                   | 67.5                     | 0.2612                     | 0.01266                                   | 1.9                        | 12                      | 40.2                    |
|                       | 72.5                     | 0.2304                     | 0.01117                                   | 1.9                        | 12                      | 40.2                    |
|                       | 77.5                     | 0.1997                     | 0.00968                                   | 1.9                        | 12                      | 40.2                    |
|                       | 85                       | 0.1536                     | 0.00745                                   | 1.9                        | 12                      | 40.2                    |
| Stroke                | >25                      | 0.2720                     | 0.07697                                   | 6.2                        | 16.7                    | 23.7                    |
|                       | 27.5                     | 0.4513                     | 0.11919                                   | 6.2                        | 16.7                    | 23.7                    |
|                       | 32.5                     | 0.4240                     | 0.11197                                   | 6.2                        | 16.7                    | 23.7                    |
|                       | 37.5                     | 0.3966                     | 0.10475                                   | 6.2                        | 16.7                    | 23.7                    |
|                       | 42.5                     | 0.3693                     | 0.09752                                   | 6.2                        | 16.7                    | 23.7                    |
|                       | 47.5                     | 0.3419                     | 0.09030                                   | 6.2                        | 16.7                    | 23.7                    |
|                       | 52.5                     | 0.3146                     | 0.08307                                   | 6.2                        | 16.7                    | 23.7                    |
|                       | 57.5                     | 0.2872                     | 0.07585                                   | 6.2                        | 16.7                    | 23.7                    |
|                       | 62.5                     | 0.2598                     | 0.06863                                   | 6.2                        | 16.7                    | 23.7                    |
|                       | 67.5                     | 0.2325                     | 0.06190                                   | 6.2                        | 16.7                    | 23.7                    |
|                       | 72.5                     | 0.2051                     | 0.05418                                   | 6.2                        | 16.7                    | 23.7                    |
|                       | 77.5                     | 0.1778                     | 0.04695                                   | 6.2                        | 16.7                    | 23.7                    |
|                       | 85                       | 0.1368                     | 0.03611                                   | 6.2                        | 16.7                    | 23.7                    |
| COPD                  | >25                      | 0.2510                     | 0.06762                                   | 6.5                        | 2.5                     | 3.2                     |
| Lung Cancer           | >25                      | 0.2942                     | 0.06147                                   | 6.2                        | 9.3                     | 29.8                    |
| LRI                   | >25                      | 0.4468                     | 0.11735                                   | 6.4                        | 5.7                     | 8.4                     |

301

302 **Table S14.** Calculated premature mortality from PM with all aerosol (base mortality) and  
 303 removing ASOA, using the IER method.

| <b>Location<sup>a</sup></b> | <b>Base Mortality</b> | <b>Mortality reduced due to removing ASOA</b> | <b>Percent mortality reduced due to removing ASOA</b> |
|-----------------------------|-----------------------|-----------------------------------------------|-------------------------------------------------------|
| North America               | 43,408                | 18,479                                        | 43%                                                   |
| Central America             | 11,808                | 3,395                                         | 29%                                                   |
| South America               | 31,214                | 10,100                                        | 32%                                                   |
| Africa                      | 258,294               | 14,869                                        | 6%                                                    |
| Western Europe              | 305,754               | 31,880                                        | 10%                                                   |
| Eastern Europe              | 195,749               | 16,003                                        | 8%                                                    |
| South Asia                  | 938,967               | 75,085                                        | 8%                                                    |
| Southeastern Asia           | 135,433               | 31,886                                        | 24%                                                   |
| East Asia                   | 1,315,720             | 122,190                                       | 9%                                                    |
| Oceania                     | 95                    | 27                                            | 28%                                                   |
| Rest of the World           | 72,385                | 13,337                                        | 18%                                                   |
| Total                       | 3,308,957             | 337,224                                       | 10%                                                   |

304 <sup>a</sup>Locations defined by:  
 305 [http://themasites.pbl.nl/tridion/en/themasites/\\_disabled\\_image/background/regions/index-2.html](http://themasites.pbl.nl/tridion/en/themasites/_disabled_image/background/regions/index-2.html)

306 **Table S15.** Calculated premature mortality from PM with all aerosol (base mortality) and  
 307 removing ASOA, using the GEMM method.

| Location <sup>a</sup> | Base Mortality | Mortality reduced due to removing ASOA | Percent mortality reduced due to removing ASOA |
|-----------------------|----------------|----------------------------------------|------------------------------------------------|
| North America         | 178,793        | 24,892                                 | 14%                                            |
| Central America       | 58,516         | 7,298                                  | 12%                                            |
| South America         | 145,395        | 22,372                                 | 15%                                            |
| Africa                | 765,946        | 34,528                                 | 5%                                             |
| Western Europe        | 768,991        | 50,427                                 | 7%                                             |
| Eastern Europe        | 465,341        | 25,552                                 | 5%                                             |
| South Asia            | 2,285,903      | 166,228                                | 7%                                             |
| Southeastern Asia     | 347,191        | 50,802                                 | 15%                                            |
| East Asia             | 2,487,349      | 220,264                                | 9%                                             |
| Oceania               | 3,375          | 428                                    | 13%                                            |
| Rest of the World     | 269,769        | 35,051                                 | 13%                                            |
| Total                 | 7,776,570      | 638,219                                | 8%                                             |

308 <sup>a</sup>Locations defined by:

309 [http://themasites.pbl.nl/tridion/en/themasites/\\_disabled\\_image/background/regions/index-2.html](http://themasites.pbl.nl/tridion/en/themasites/_disabled_image/background/regions/index-2.html)

310 **Table S16.** List of total final consumption, in millions of tonnes of oil equivalent, of oil products  
 311 and oil, for each organization. Total final consumption includes imports, and does not include  
 312 exports (IEA, 2019).

| Organization                   | Industry | Transportation | Non-Energy |
|--------------------------------|----------|----------------|------------|
| World                          | 307      | 2533           | 645        |
| OECD                           | 89       | 1147           | 326        |
| Africa                         | 18.4     | 115.4          | 7.9        |
| Non-OECD                       | 28.3     | 135            | 20         |
| Middle East                    | 33.5     | 126.3          | 47.5       |
| Non-OECD Europe<br>and Eurasia | 35       | 101            | 53         |

313

314 Supplemental figures for this study

315

316

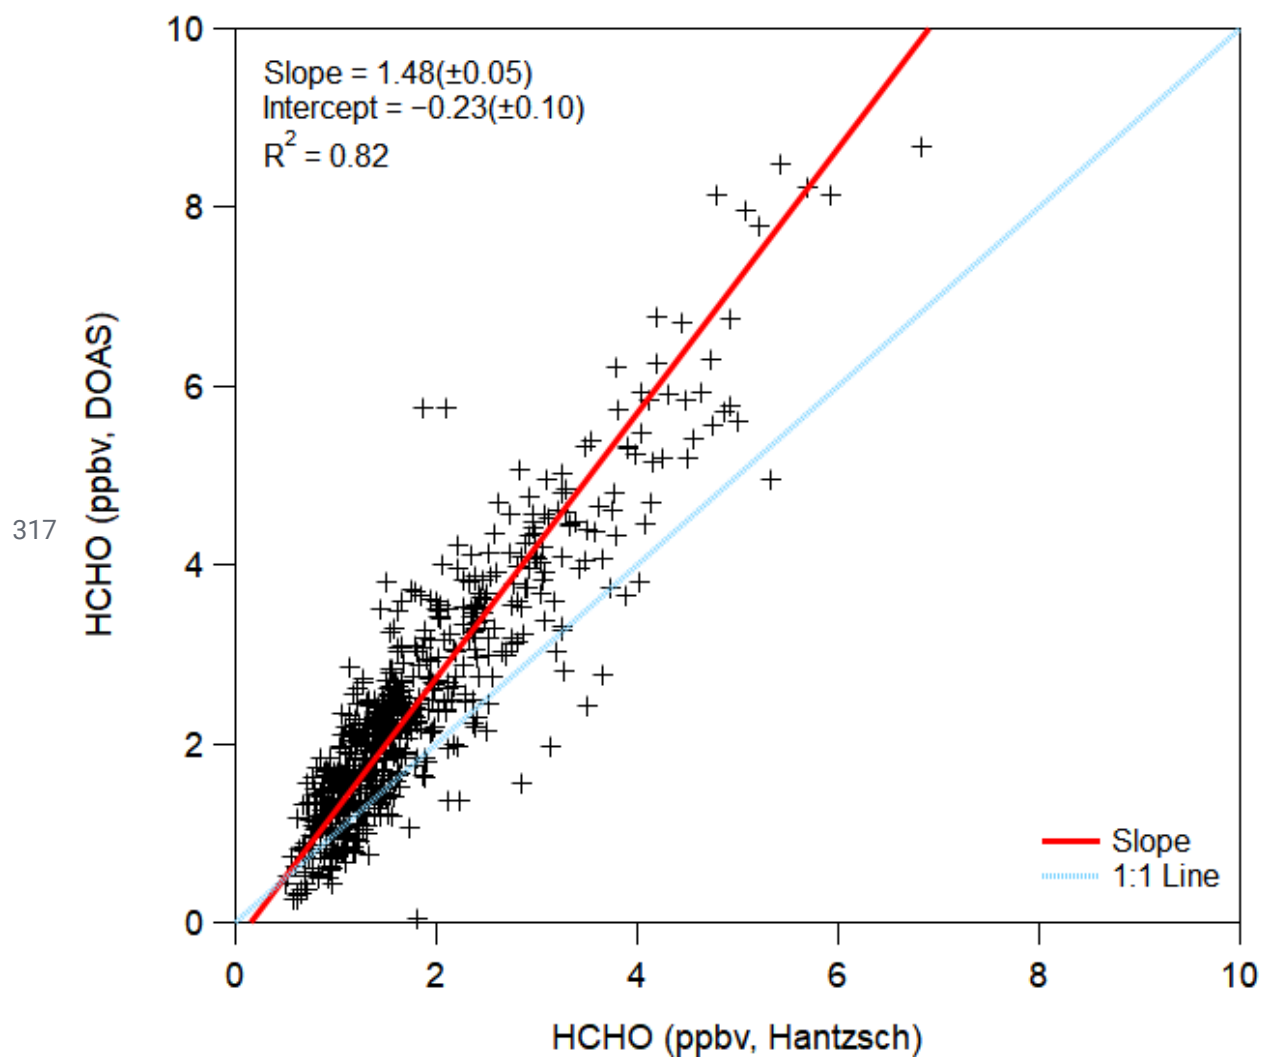

318 **Figure S1.** Comparison of HCHO measured by the DOAS (Stutz and Platt, 1996, 1997) and  
319 Hantzsch reaction (Cárdenas et al., 2000) methods during the CalNex 2010 study in Pasadena,  
320 CA, ground site (Ryerson et al., 2013).

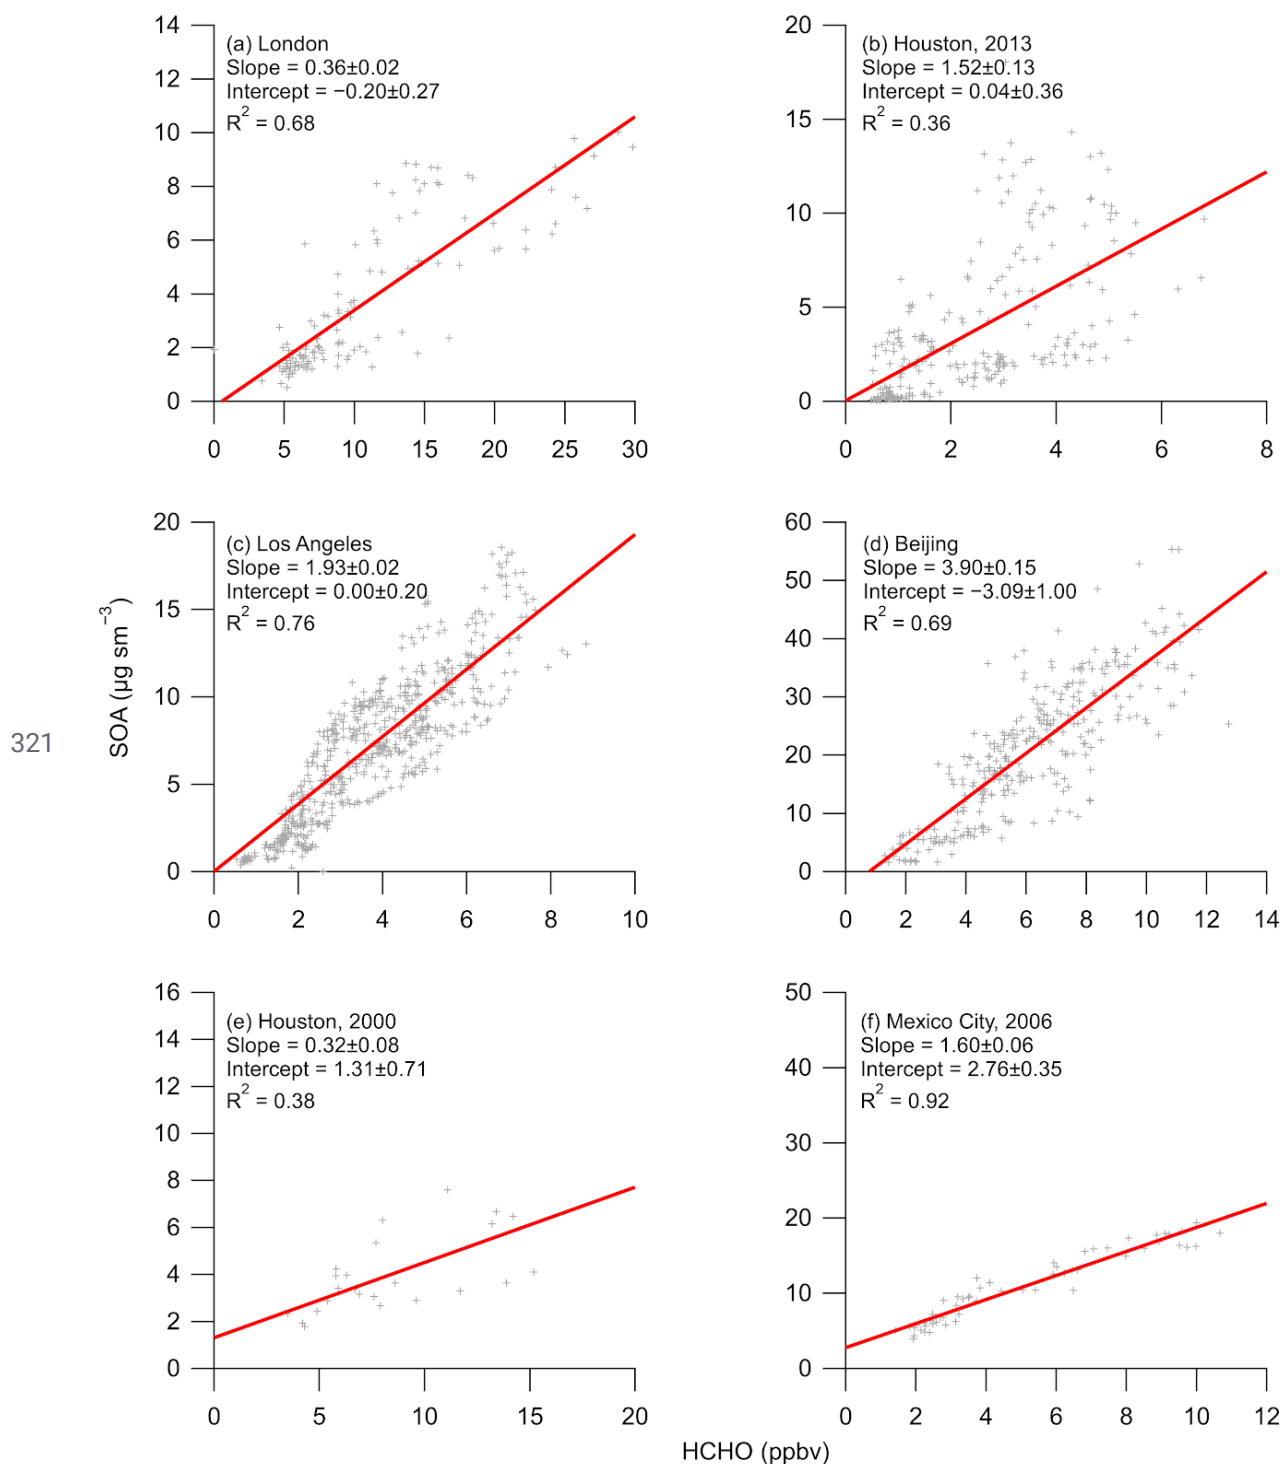

**Figure S2.** Regression plot of SOA versus HCHO from different campaigns around the world that have not been previously published. Note, for (c), HCHO is  $1.24 \times$  Hantzsch HCHO, to account for the differences between the two HCHO measurements during CalNex. Note, for (a), SOA is  $0.5 \times$  OA, estimated from Young et al. (2015), and for (f), SOA is  $0.8 \times$  OA, estimated from DeCarlo et al. (2010).

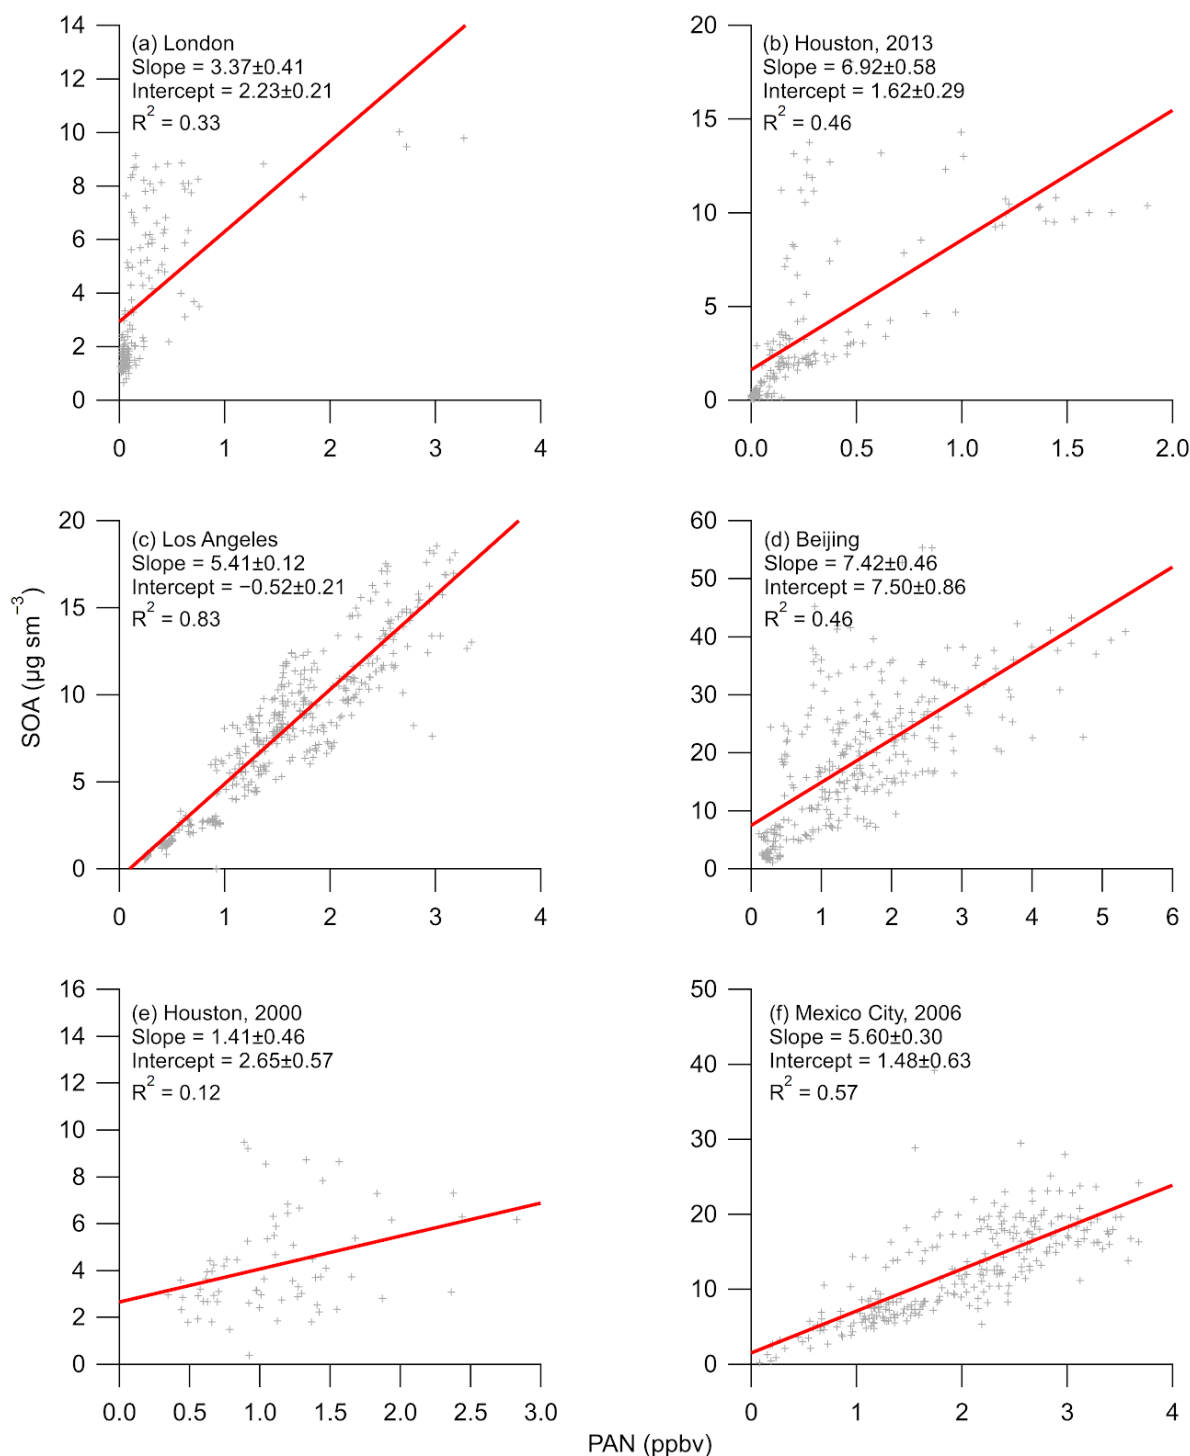

**Figure S3.** Regression plot of SOA versus PAN from different campaigns around the world that have not been previously published. Note, for (a), SOA is  $0.5 \times \text{OA}$ , estimated from Young et al. (2015), and for (f), SOA is  $0.8 \times \text{OA}$ , estimated from DeCarlo et al. (2010).



332

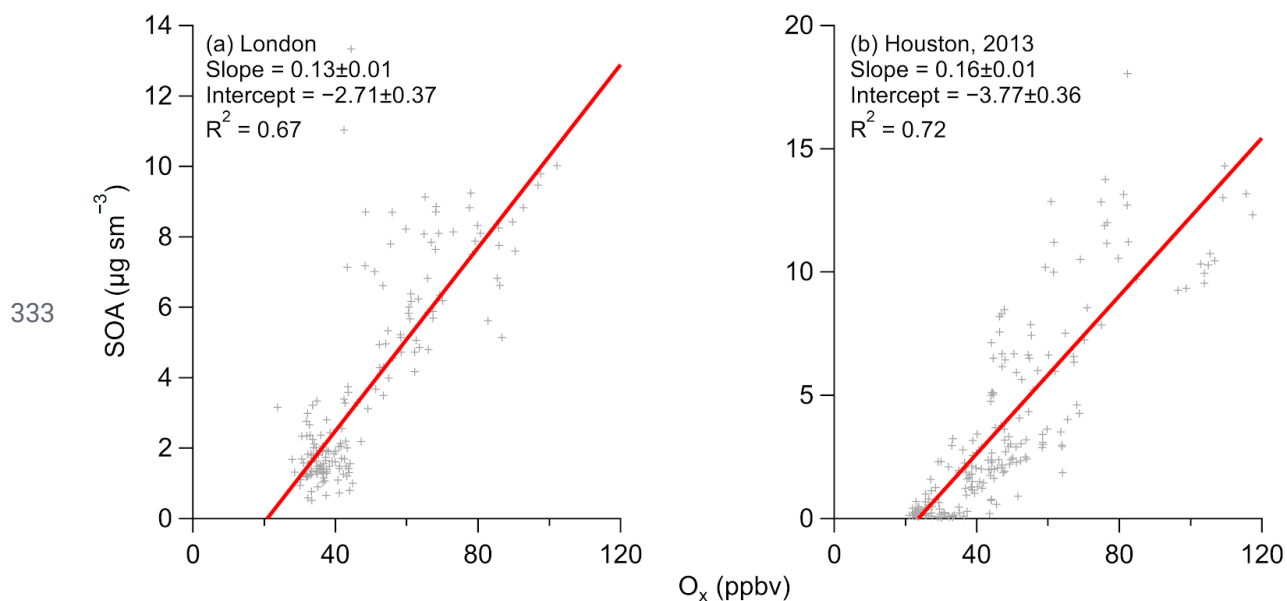

334 **Figure S4.** Regression plot of SOA versus Ox from different campaigns around the world that  
 335 have not been previously published. Note, for (a), SOA is  $0.5 \times \text{OA}$ , estimated from Young et al.  
 336 (2015).

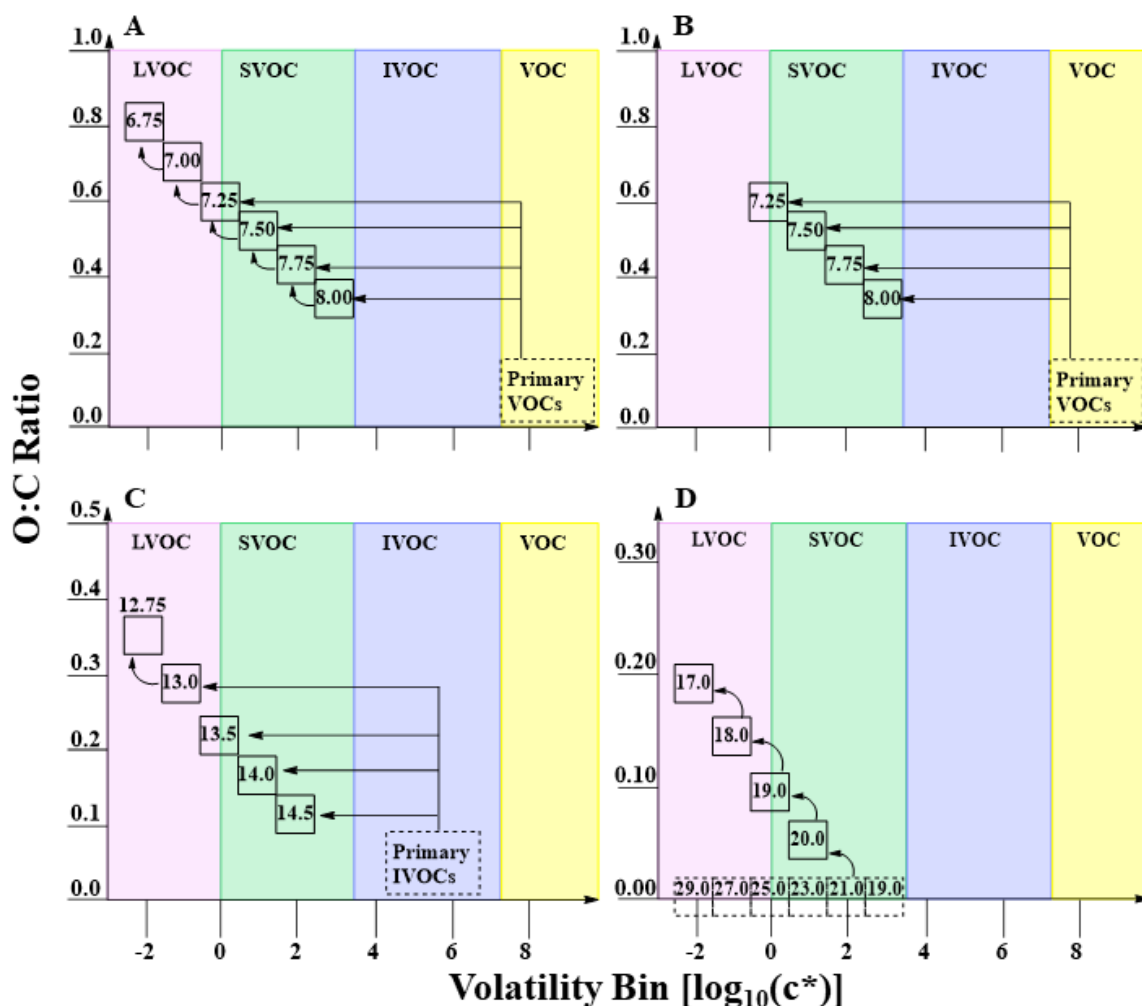

**Figure S5.** 2-D VBS space defined by oxygen to carbon (O:C) ratio and saturation concentration  $[\log_{10}(c^*)]$  for different oxidation mechanisms and primary sources of OA precursors. Dashed boxes represent primary emissions, while the full boxes represent the secondary oxidation products. (A) and (B) represent different parameterizations for treating traditional anthropogenic and biogenic sources of SOA. Both parameterizations depict the oxidation of an 8-carbon precursor VOC. (A) represents the TSI, or aging, parameterization; (B) represents the MA, or wall-loss corrected, parameterization. (C) Represents the initial oxidation and aging pathway of P-IVOCs following the ZHAO parameterization. It should be noted that the carbon number corresponds to first generation aging and subsequent oxidation results in a 0.25 reduction in carbon number. (D) Represents the decadal aging of SVOCs by hydroxyl radicals. In (D), the full aging pathway of only the C21 species is depicted as an example, though all primary species are allowed to age until the  $\log_{10}(c^*) = -2$  bin. All emitted P-SVOC species undergo the same decadal aging scheme which begins from the saturation concentration bin of the emitted species.

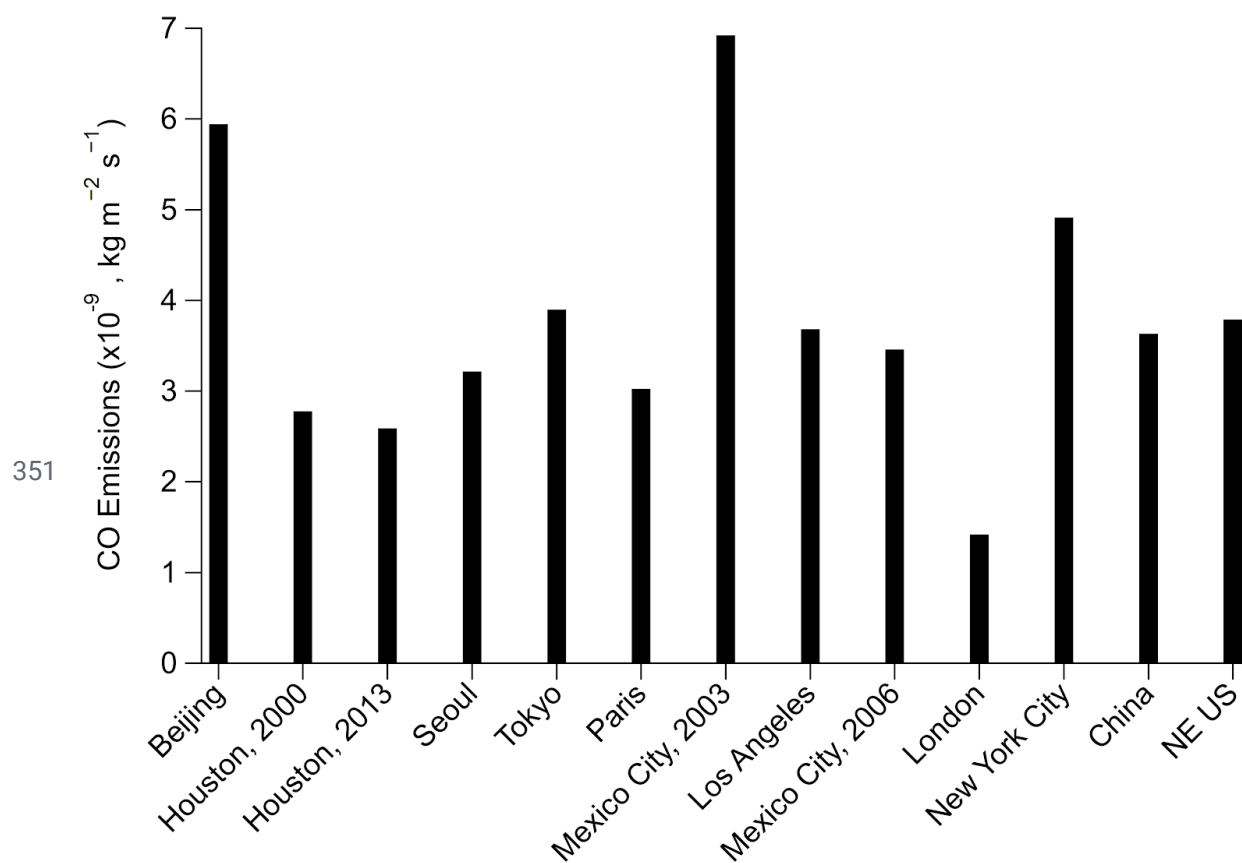

352 **Figure S6.** CO emissions for the cities investigated here from HTAP (Janssens-Maenhout et al.,  
 353 2015).

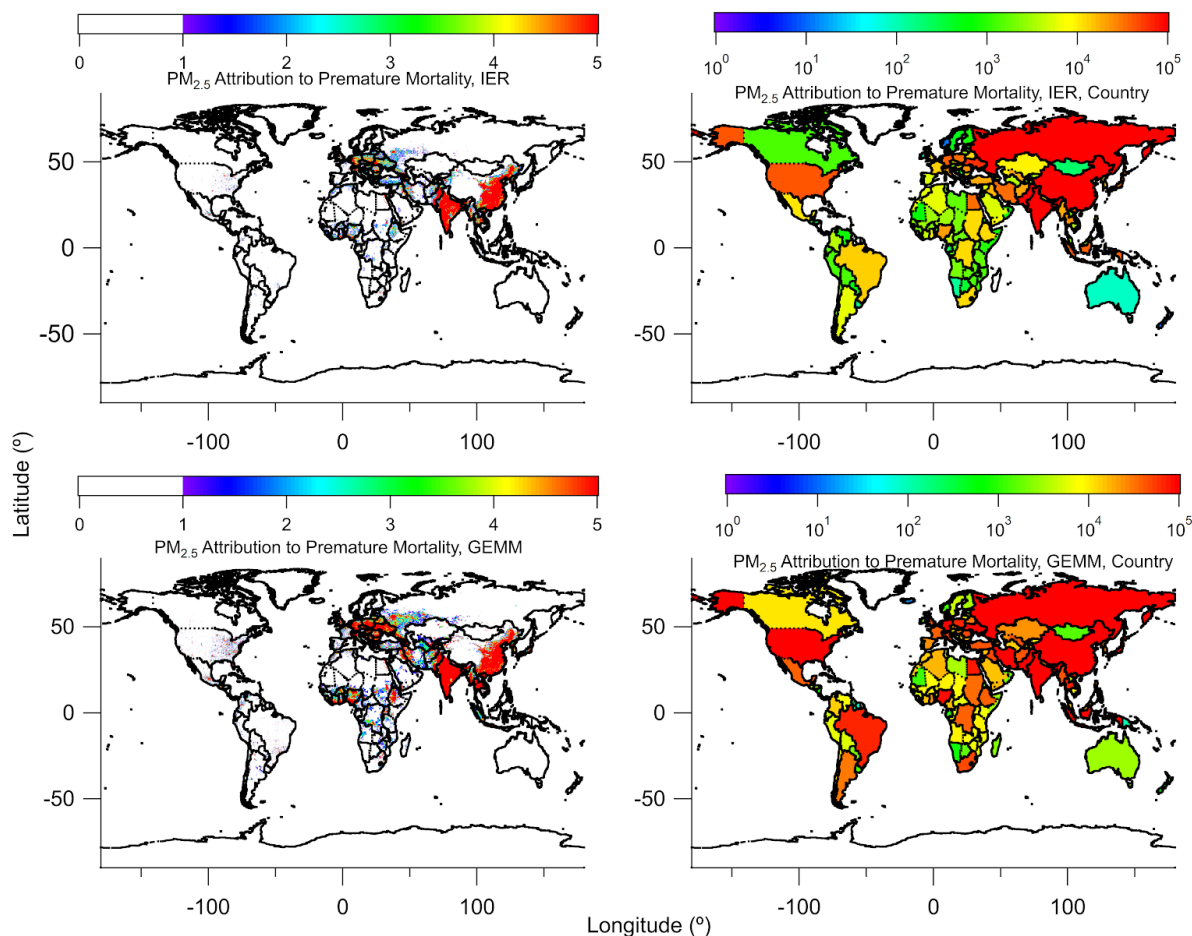

**Figure S7.** (top) Total deaths associated to PM<sub>2.5</sub> (left) per 10×10 km<sup>2</sup> area and (right) summed up for each country, using the Integrated Exposure-Response (IER) method (Burnett et al., 2014). These values are derived from satellite. (bottom) Same as above, but using the Global Exposure Mortality Model (GEMM) (Burnett et al., 2018) for PM<sub>2.5</sub> per 10×10 km<sup>2</sup> area (left) and summed up for each country (right). Premature mortality was determined with PM<sub>2.5</sub> derived by the methods described in van Donkelaar (2016), which includes satellite and ground-based observations of aerosol.

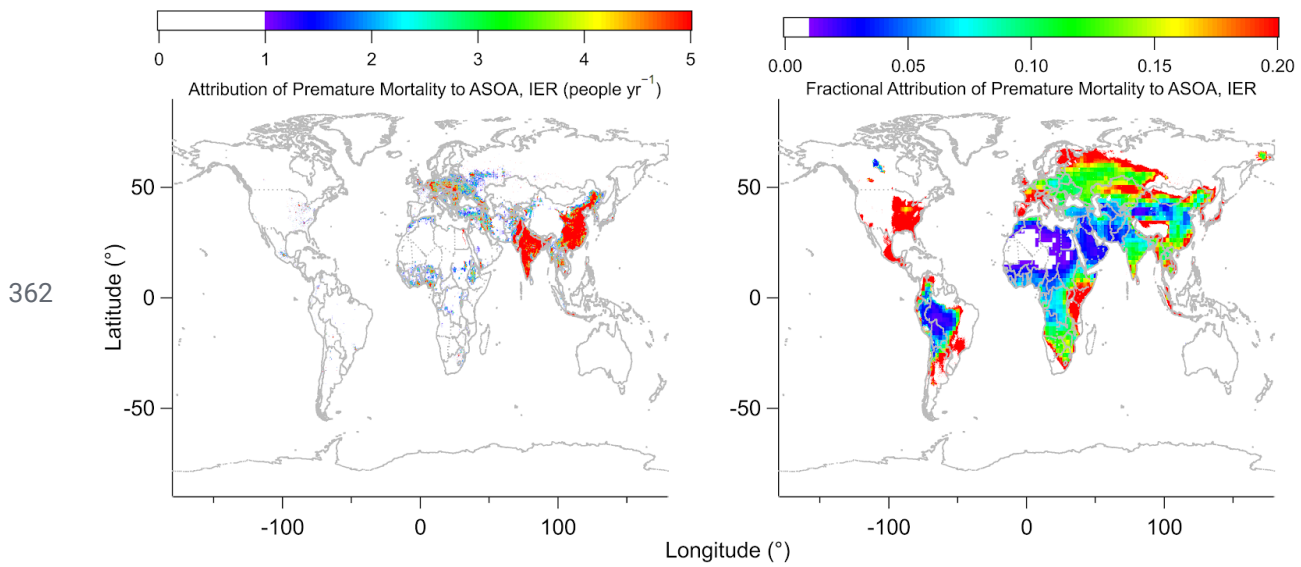

**Figure S8.** Same as Fig. 8, where top are the results per 10×10 km<sup>2</sup> area for the attribution of premature mortality to ASOA (people yr<sup>-1</sup>, left) and fractional attribution of premature mortality to ASOA for one year (right) by the IER method. See Fig. 8 for per country comparison.

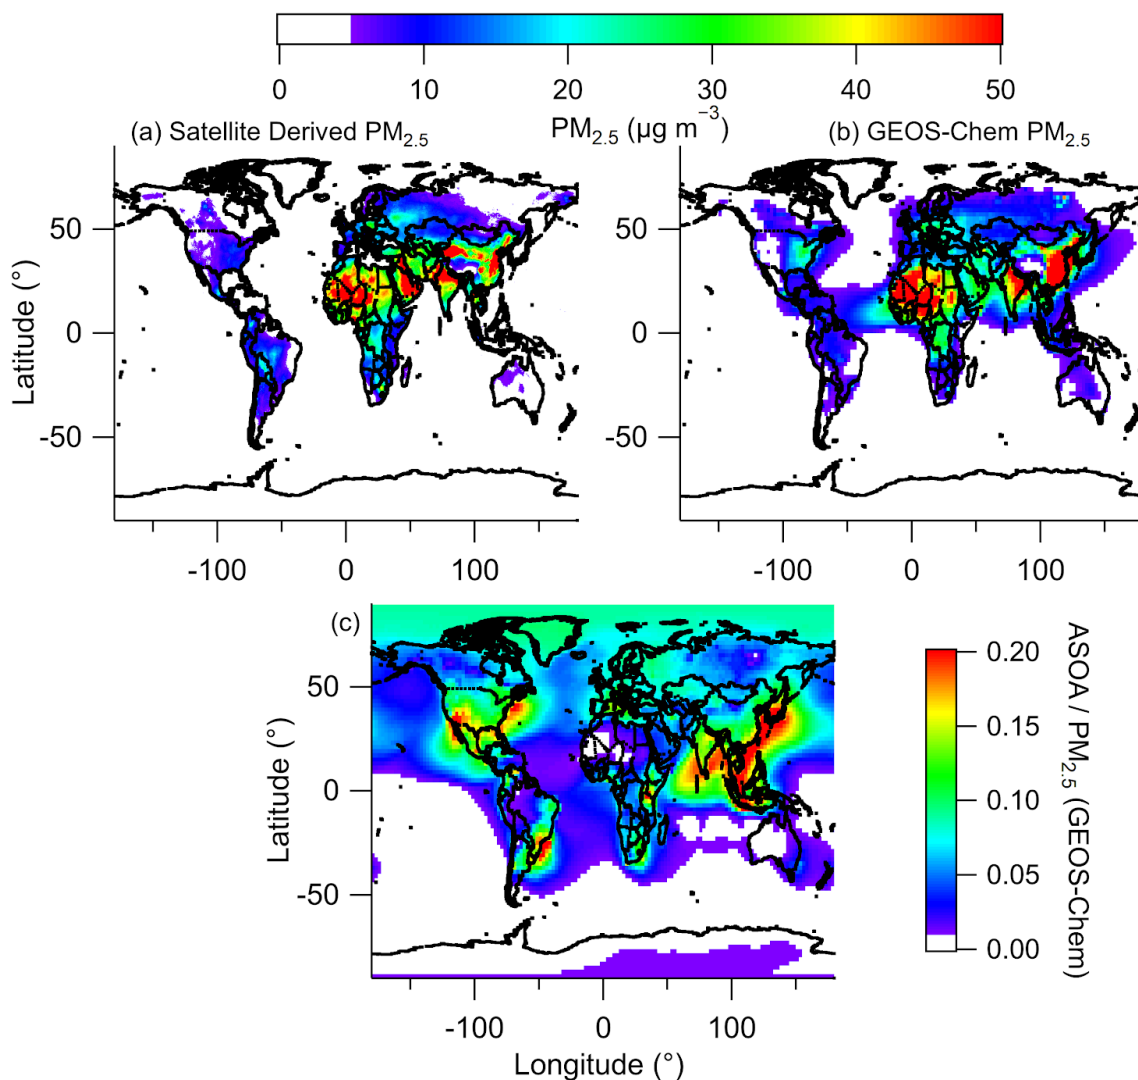

**Figure S9.** Comparison of satellite retrieved PM<sub>2.5</sub> (upper left) versus modeled PM<sub>2.5</sub> (upper right). (Bottom) Fractional contribution of ASOA to total modeled PM<sub>2.5</sub>.

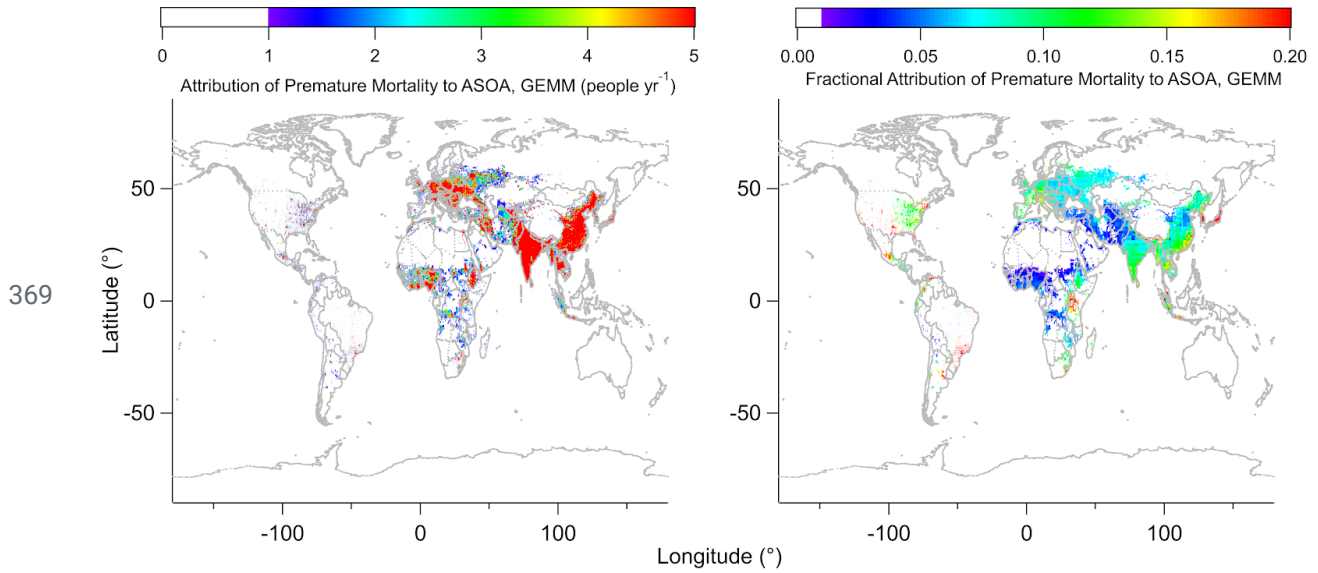

**Figure S10.** Same as Fig. S8, but using the GEMM from Burnett et al. (2018). (top). (Left) Attribution of premature mortality to ASOA per 10×10 km<sup>2</sup> area (people yr<sup>-1</sup>) and (Right) fractional attribution of premature mortality to ASOA per 10×10<sup>2</sup> km for one year.

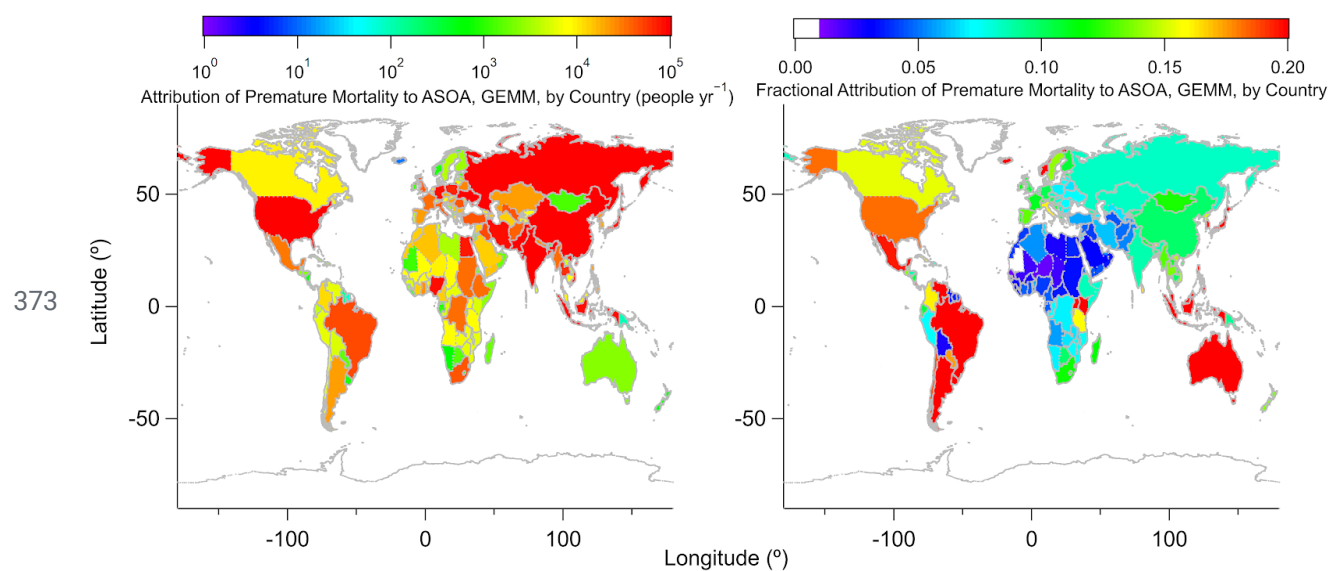

374 **Figure S11.** Same as Fig. S10 but summed up for each country for the (left) attribution of  
 375 premature mortality to ASOA (people yr<sup>-1</sup>) and (right) the fractional attribution of premature  
 376 mortality to ASOA for one year.



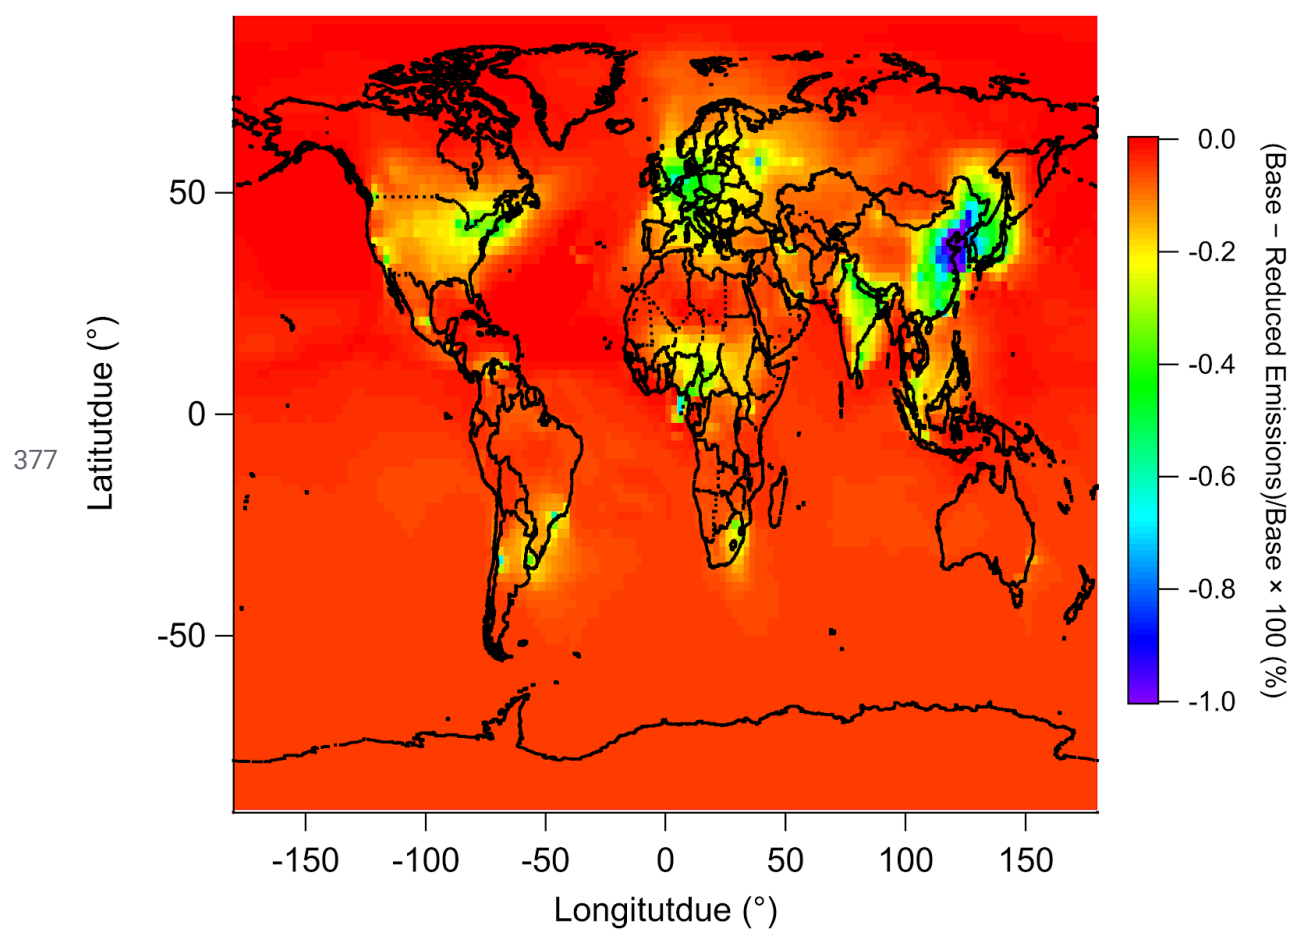

378 **Figure S12.** Comparison for surface level ozone upon reducing SOA precursors by 20%.

## 379 References

- 380 Apel, E. C., Emmons, L. K., Karl, T., Flocke, F., Hills, a. J., Madronich, S., Lee-Taylor, J., Fried,  
381 A., Weibring, P., Walega, J., Richter, D., Tie, X., Mauldin, L., Campos, T., Weinheimer, A.,  
382 Knapp, D., Sive, B., Kleinman, L., Springston, S., Zaveri, R., Ortega, J., Voss, P., Blake, D.,  
383 Baker, A., Warneke, C., Welsh-Bon, D., de Gouw, J., Zheng, J., Zhang, R., Rudolph, J.,  
384 Junkermann, W. and Riemer, D. D.: Chemical evolution of volatile organic compounds in the  
385 outflow of the Mexico City Metropolitan area, *Atmos. Chem. Phys.*, 10(5), 2353–2375, 2010.
- 386 Atkinson, R. and Arey, J.: Atmospheric Degradation of Volatile Organic Compounds, *Chem.*  
387 *Rev.*, 103, 4605–4638, 2003.
- 388 Atkinson, R., Baulch, D. L., Cox, R. A., Crowley, J. N., Hampson, R. F., Hynes, R. G., Jenkin,  
389 M. E., Rossi, M. J., Troe, J. and IUPAC Subcommittee: Evaluated kinetic and photochemical  
390 data for atmospheric chemistry: Volume II - gas phase reactions of organic species, *Atmos.*  
391 *Chem. Phys.*, 6(11), 3625–4055, 2006.
- 392 Baker, A. K., Beyersdorf, A. J., Doezema, L. A., Katzenstein, A., Meinardi, S., Simpson, I. J.,  
393 Blake, D. R. and Sherwood Rowland, F.: Measurements of nonmethane hydrocarbons in 28  
394 United States cities, *Atmos. Environ.*, 42(1), 170–182, 2008.
- 395 Blake, N. J., Blake, D. R., Simpson, I. J., Meinardi, S., Swanson, A. L., Lopez, J. P., Katzenstein,  
396 A. S., Barletta, B., Shirai, T., Atlas, E., Sachse, G., Avery, M., Vay, S., Fuelberg, H. E., Kiley, C.  
397 M., Kita, K. and Rowland, F. S.: NMHCs and halocarbons in Asian continental outflow during  
398 the Transport and Chemical Evolution over the Pacific (TRACE-P) Field Campaign: Comparison  
399 with PEM-West B, *Journal of Geophysical Research-Atmospheres*, 108(D20), 8806, 2003.
- 400 Bohn, B. and Zetzsch, C.: Kinetics and mechanism of the reaction of OH with the  
401 trimethylbenzenes – experimental evidence for the formation of adduct isomers, *Phys. Chem.*  
402 *Chem. Phys.*, 14(40), 13933, 2012.
- 403 Burnett, R., Chen, H., Szyszkowicz, M., Fann, N., Hubbell, B., Pope, C. A., Apte, J. S., Brauer,  
404 M., Cohen, A., Weichenthal, S., Coggins, J., Di, Q., Brunekreef, B., Frostad, J., Lim, S. S., Kan,  
405 H., Walker, K. D., Thurston, G. D., Hayes, R. B., Lim, C. C., Turner, M. C., Jerrett, M., Krewski,  
406 D., Gapstur, S. M., Diver, W. R., Ostro, B., Goldberg, D., Crouse, D. L., Martin, R. V., Peters, P.,  
407 Pinault, L., Tjepkema, M., van Donkelaar, A., Villeneuve, P. J., Miller, A. B., Yin, P., Zhou, M.,  
408 Wang, L., Janssen, N. A. H., Marra, M., Atkinson, R. W., Tsang, H., Quoc Thach, T., Cannon, J.  
409 B., Allen, R. T., Hart, J. E., Laden, F., Cesaroni, G., Forastiere, F., Weinmayr, G., Jaensch, A.,  
410 Nagel, G., Concin, H. and Spadaro, J. V.: Global estimates of mortality associated with long-term  
411 exposure to outdoor fine particulate matter, *Proc. Natl. Acad. Sci. U. S. A.*, 115(38), 9592–9597,  
412 2018.
- 413 Burnett, R. T., Pope, C. A., Ezzati, M., Olives, C., Lim, S. S., Mehta, S., Shin, H. H., Singh, G.,  
414 Hubbell, B., Brauer, M., Anderson, H. R., Smith, K. R., Balmes, J. R., Bruce, N. G., Kan, H.,  
415 Laden, F., Prüss-Ustün, A., Turner, M. C., Gapstur, S. M., Diver, W. R. and Cohen, A.: An  
416 integrated risk function for estimating the global burden of disease attributable to ambient fine

417 particulate matter exposure, *Environ. Health Perspect.*, 122(4), 397–403, 2014.

418 CARB: CEPAM: 2013 Almanac - Standard Emissions Tool, [online] Available from:  
 419 <https://www.arb.ca.gov/app/emsinv/fcemssumcat2013.php>, 2013.

420 Cárdenas, L. M., Brassington, D. J., Allan, B. J., Coe, H., Alicke, B., Platt, U., Wilson, K. M.,  
 421 Plane, J. M. C. and Penkett, S. A.: Intercomparison of Formaldehyde Measurements in Clean and  
 422 Polluted Atmospheres, *J. Atmos. Chem.*, 37(1), 53–80, 2000.

423 Cazorla, M., Wolfe, G. M., Bailey, S. A., Swanson, A. K., Arkinson, H. L. and Hanisco, T. F.: A  
 424 new airborne laser-induced fluorescence instrument for in situ detection of formaldehyde  
 425 throughout the troposphere and lower stratosphere, *Atmos. Meas. Tech.*, 8(2), 541–552, 2015.

426 CCPR: The California Consumer Products Regulation., 2015.

427 Davis, M. S.: 2005 Architectural Coatings Survey Final Report, CARB., 2007.

428 DeCarlo, P. F., Kimmel, J. R., Trimborn, A., Northway, M. J., Jayne, J. T., Aiken, A. C., Gonin,  
 429 M., Fuhrer, K., Horvath, T., Docherty, K. S., Worsnop, D. R. and Jimenez, J. L.:  
 430 Field-deployable, high-resolution, time-of-flight aerosol mass spectrometer, *Anal. Chem.*,  
 431 78(24), 8281–8289, 2006.

432 DeCarlo, P. F., Ulbrich, I. M., Crounse, J., de Foy, B., Dunlea, E. J., Aiken, A. C., Knapp, D.,  
 433 Weinheimer, A. J., Campos, T., Wennberg, P. O. and Jimenez, J. L.: Investigation of the sources  
 434 and processing of organic aerosol over the Central Mexican Plateau from aircraft measurements  
 435 during MILAGRO, *Atmos. Chem. Phys.*, 10(12), 5257–5280, 2010.

436 van Donkelaar, A., Martin, R. V., Brauer, M., Hsu, N. C., Kahn, R. A., Levy, R. C., Lyapustin,  
 437 A., Sayer, A. M. and Winker, D. M.: Global Estimates of Fine Particulate Matter using a  
 438 Combined Geophysical-Statistical Method with Information from Satellites, Models, and  
 439 Monitors, *Environ. Sci. Technol.*, 50(7), 3762–3772, 2016.

440 Drewnick, F., Hings, S. S., DeCarlo, P., Jayne, J. T., Gonin, M., Fuhrer, K., Weimer, S., Jimenez,  
 441 J. L., Demerjian, K. L., Borrmann, S. and Worsnop, D. R.: A New Time-of-Flight Aerosol Mass  
 442 Spectrometer (TOF-AMS)—Instrument Description and First Field Deployment, *Aerosol Sci.*  
 443 *Technol.*, 39(7), 637–658, 2005.

444 Dunmore, R. E., Hopkins, J. R., Lidster, R. T., Lee, J. D., Evans, M. J., Rickard, A. R., Lewis, A.  
 445 C. and Hamilton, J. F.: Diesel-related hydrocarbons can dominate gas phase reactive carbon in  
 446 megacities, *Atmos. Chem. Phys.*, 15, 9983–9996, 2015.

447 EMEP/EEA: EMEP/EEA Air Pollutant Emission Inventory Guidebook 2016, EEA,  
 448 Luxembourg., 2016.

449 EPA: SPECIATE v4.4, US Environmental Protection Agency., 2014.

450 Fisher, J. A., Jacob, D. J., Travis, K. R., Kim, P. S., Marais, E. A., Miller, C. C., Yu, K., Zhu, L.,

451 Yantosca, R. M., Sulprizio, M. P., Mao, J., Wennberg, P. O., Crounse, J. D., Teng, A. P., Nguyen,  
 452 T. B., Clair, J. M. S., Cohen, R. C., Romer, P., Nault, B. A., Wooldridge, P. J., Jimenez, J. L.,  
 453 Campuzano-Jost, P., Day, D. A., Hu, W., Shepson, P. B., Xiong, F., Blake, D. R., Goldstein, A.  
 454 H., Misztal, P. K., Hanisco, T. F., Wolfe, G. M., Ryerson, T. B., Wisthaler, A. and Mikoviny, T.:  
 455 Organic nitrate chemistry and its implications for nitrogen budgets in an isoprene- and  
 456 monoterpene-rich atmosphere: Constraints from aircraft (SEAC<sup>4</sup>RS) and ground-based (SOAS)  
 457 observations in the Southeast US, *Atmos. Chem. Phys.*, 16(9), doi:10.5194/acp-16-5969-2016,  
 458 2016.

459 Fried, A., Crawford, J., Olson, J., Walega, J., Potter, W., Wert, B., Jordan, C., Anderson, B.,  
 460 Shetter, R., Lefer, B., Blake, D., Blake, N., Meinardi, S., Heikes, B., O'Sullivan, D., Snow, J.,  
 461 Fuelberg, H., Kiley, C. M., Sandholm, S., Tan, D., Sachse, G., Singh, H., Faloona, I., Harward,  
 462 C. N. and Carmichael, G. R.: Airborne tunable diode laser measurements of formaldehyde during  
 463 TRACE-P: Distributions and box model comparisons, *J. Geophys. Res. D: Atmos.*, 108(D20),  
 464 8798, 2003.

465 Gately, C. K., Huttyra, L. R. and Wing, I. S.: Cities, traffic, and CO<sub>2</sub>: A multidecadal assessment  
 466 of trends, drivers, and scaling relationships, *Proc. Natl. Acad. Sci. U. S. A.*, 112(16), 4999–5004,  
 467 2015.

468 Gentner, D. R., Isaacman, G., Worton, D. R., Chan, A. W. H., Dallmann, T. R., Davis, L., Liu, S.,  
 469 Day, D. A., Russell, L. M., Wilson, K. R., Weber, R., Guha, A., Harley, R. A. and Goldstein, A.  
 470 H.: Elucidating secondary organic aerosol from diesel and gasoline vehicles through detailed  
 471 characterization of organic carbon emissions, *Proc. Natl. Acad. Sci. U. S. A.*, 109(45),  
 472 18318–18323, 2012.

473 Gentner, D. R., Worton, D. R., Isaacman, G., Davis, L. C., Dallmann, T. R., Wood, E. C.,  
 474 Herndon, S. C., Goldstein, A. H. and Harley, R. A.: Chemical Composition of Gas-Phase  
 475 Organic Carbon Emissions from Motor Vehicles and Implications for Ozone Production,  
 476 *Environ. Sci. Technol.*, 47(20), 11837–11848, 2013.

477 Gerbig, C., Schmitgen, S., Kley, D., Volz-Thomas, A., Dewey, K. and Haaks, D.: An improved  
 478 fast-response vacuum-UV resonance fluorescence CO instrument, *J. Geophys. Res. D: Atmos.*,  
 479 104(D1), 1699–1704, 1999.

480 Gilman, J. B., Burkhardt, J. F., Lerner, B. M., Williams, E. J., Kuster, W. C., Goldan, P. D.,  
 481 Murphy, P. C., Warneke, C., Fowler, C., Montzka, S. A., Miller, B. R., Miller, L., Oltmans, S. J.,  
 482 Ryerson, T. B., Cooper, O. R., Stohl, A. and de Gouw, J. A.: Ozone variability and halogen  
 483 oxidation within the Arctic and sub-Arctic springtime boundary layer, *Atmos. Chem. Phys.*,  
 484 10(21), 10223–10236, 2010.

485 de Gouw, J. A., Middlebrook, A. M., Warneke, C., Goldan, P. D., Kuster, W. C., Roberts, J. M.,  
 486 Fehsenfeld, F. C., Worsnop, D. R., Canagaratna, M. R., Pszenny, A. A. P., Keene, W. C.,  
 487 Marchewka, M., Bertman, S. B. and Bates, T. S.: Budget of organic carbon in a polluted  
 488 atmosphere: Results from the New England Air Quality Study in 2002, *J. Geophys. Res. D:*

489 Atmos., 110(16), 1–22, 2005.

490 de Gouw, J. A., Gilman, J. B., Kim, S.-W., Lerner, B. M., Isaacman-VanWertz, G., McDonald, B.  
491 C., Warneke, C., Kuster, W. C., Lefer, B. L., Griffith, S. M., Dusanter, S., Stevens, P. S. and  
492 Stutz, J.: Chemistry of Volatile Organic Compounds in the Los Angeles basin: Nighttime  
493 Removal of Alkenes and Determination of Emission Ratios, *J. Geophys. Res.: Atmos.*, 122(21),  
494 11,843–11,861, 2017.

495 Griffith, S. M., Hansen, R. F., Dusanter, S., Michoud, V., Gilman, J. B., Kuster, W. C., Veres, P.  
496 R., Graus, M., Gouw, J. A., Roberts, J., Young, C., Washenfelder, R., Brown, S. S., Thalman, R.,  
497 Waxman, E., Volkamer, R., Tsai, C., Stutz, J., Flynn, J. H., Grossberg, N., Lefer, B., Alvarez, S.  
498 L., Rappenglueck, B., Mielke, L. H., Osthoff, H. D. and Stevens, P. S.: Measurements of  
499 hydroxyl and hydroperoxy radicals during CalNex-LA: Model comparisons and radical budgets,  
500 *J. Geophys. Res. D: Atmos.*, 121(8), 4211–4232, 2016.

501 Hassler, B., McDonald, B. C., Frost, G. J., Borbon, A., Carslaw, D. C., Civerolo, K., Granier, C.,  
502 Monks, P. S., Monks, S., Parrish, D. D., Pollack, I. B., Rosenlof, K. H., Ryerson, T. B., von  
503 Schneidemesser, E. and Trainer, M.: Analysis of long-term observations of NO<sub>x</sub> and CO in  
504 megacities and application to constraining emissions inventories, *Geophys. Res. Lett.*, 43(18),  
505 9920–9930, 2016.

506 Hayes, P. L., Ortega, A. M., Cubison, M. J., Froyd, K. D., Zhao, Y., Cliff, S. S., Hu, W. W.,  
507 Toohey, D. W., Flynn, J. H., Lefer, B. L., Grossberg, N., Alvarez, S., Rappenglück, B., Taylor, J.  
508 W., Allan, J. D., Holloway, J. S., Gilman, J. B., Kuster, W. C., de Gouw, J. A., Massoli, P.,  
509 Zhang, X., Liu, J., Weber, R. J., Corrigan, A. L., Russell, L. M., Isaacman, G., Worton, D. R.,  
510 Kreisberg, N. M., Goldstein, A. H., Thalman, R., Waxman, E. M., Volkamer, R., Lin, Y. H.,  
511 Surratt, J. D., Kleindienst, T. E., Offenberg, J. H., Dusanter, S., Griffith, S., Stevens, P. S.,  
512 Brioude, J., Angevine, W. M. and Jimenez, J. L.: Organic aerosol composition and sources in  
513 Pasadena, California, during the 2010 CalNex campaign, *J. Geophys. Res. D: Atmos.*, 118(16),  
514 9233–9257, 2013.

515 Huey L Tanner D Slusher D Dibb J Arimoto R Chen G Davis D Buhr M Nowak J Mauldin R  
516 Eisele F, K. E.: CIMS measurements of HNO<sub>3</sub> and SO<sub>2</sub> at the South Pole during ISCAT 2000,  
517 *Atmos. Environ.*, 38(32), 5411–5421, 2004.

518 Hu, W., Hu, M., Hu, W., Jimenez, J. L., Yuan, B., Chen, W., Wang, M., Wu, Y., Chen, C., Wang,  
519 Z., Peng, J., Zeng, L. and Shao, M.: Chemical composition, sources, and aging process of  
520 submicron aerosols in Beijing: Contrast between summer and winter, *J. Geophys. Res. D:*  
521 *Atmos.*, 121(4), 1955–1977, 2016.

522 IEA: World energy balances, IEA World Energy Statistics and Balances,  
523 doi:10.1787/data-00521-en, 2019.

524 Janssens-Maenhout, G., Crippa, M., Guizzardi, D., Dentener, F., Muntean, M., Pouliot, G.,  
525 Keating, T., Zhang, Q., Kurokawa, J., Wankmüller, R., Denier van der Gon, H., Kuenen, J. J. P.,  
526 Klimont, Z., Frost, G., Darras, S., Koffi, B. and Li, M.: HTAP\_v2.2: a mosaic of regional and

527 global emission grid maps for 2008 and 2010 to study hemispheric transport of air pollution,  
 528 *Atmos. Chem. Phys.*, 15(19), 11411–11432, 2015.

529 Jayne, J. T., Leard, D. C., Zhang, X. F., Davidovits, P., Smith, K. A., Kolb, C. E. and Worsnop,  
 530 D. R.: Development of an aerosol mass spectrometer for size and composition analysis of  
 531 submicron particles, *Aerosol Sci. Technol.*, 33(1-2), 49–70, 2000.

532 Kaiser, J., Jacob, D. J., Zhu, L., Travis, K. R., Fisher, J. A., González Abad, G., Zhang, L.,  
 533 Zhang, X., Fried, A., Crounse, J. D., St. Clair, J. M. and Wisthaler, A.: High-resolution inversion  
 534 of OMI formaldehyde columns to quantify isoprene emission on ecosystem-relevant scales:  
 535 application to the southeast US, *Atmos. Chem. Phys.*, 18(8), 5483–5497, 2018.

536 Kim, S., Huey, L. G., Stickel, R. E., Tanner, D. J., Crawford, J. H., Olson, J. R., Chen, G., Brune,  
 537 W. H., Ren, X., Leshner, R., Wooldridge, P. J., Bertram, T. H., Perring, A., Cohen, R. C., Lefer, B.  
 538 L., Shetter, R. E., Avery, M., Diskin, G. and Sokolik, I.: Measurement of HO<sub>2</sub>NO<sub>2</sub> in the free  
 539 troposphere during the Intercontinental Chemical Transport Experiment–North America 2004, *J.*  
 540 *Geophys. Res. D: Atmos.*, 112, D12S01, 2007.

541 Kleinman, L. I., Daum, P. H., Lee, Y.-N., Senum, G. I., Springston, S. R., Wang, J., Berkowitz,  
 542 C., Hubbe, J., Zaveri, R. A., Brechtel, F. J., Jayne, J., Onasch, T. B. and Worsnop, D.: Aircraft  
 543 observations of aerosol composition and ageing in New England and Mid-Atlantic States during  
 544 the summer 2002 New England Air Quality Study field campaign, *J. Geophys. Res. D: Atmos.*,  
 545 112(D9), D09310, 2007.

546 Langford, B., Nemitz, E., House, E., Phillips, G. J., Famulari, D., Davison, B., Hopkins, J. R.,  
 547 Lewis, A. C. and Hewitt, C. N.: Fluxes and concentrations of volatile organic compounds above  
 548 central London, UK, *Atmos. Chem. Phys.*, 10(2), 627–645, 2010.

549 Li, M., Zhang, Q., Streets, D. G., He, K. B., Cheng, Y. F., Emmons, L. K., Huo, H., Kang, S. C.,  
 550 Lu, Z., Shao, M., Su, H., Yu, X. and Zhang, Y.: Mapping Asian anthropogenic emissions of  
 551 non-methane volatile organic compounds to multiple chemical mechanisms, *Atmos. Chem.*  
 552 *Phys.*, 14(11), 5617–5638, 2014.

553 Li, M., Liu, H., Geng, G., Hong, C., Liu, F., Song, Y., Tong, D., Zheng, B., Cui, H., Man, H.,  
 554 Zhang, Q. and He, K.: Anthropogenic emission inventories in China: a review, *Natl Sci Rev*,  
 555 4(6), 834–866, 2017.

556 Li, M., Zhang, Q., Zheng, B., Tong, D., Lei, Y., Liu, F., Chaopeng, H., Kang, S., Yan, L., Zhang,  
 557 Y., Bo, Y., Su, H., Cheng, Y. and He, K.: Persistent growth of anthropogenic non-methane  
 558 volatile organic compound (NMVOC) emissions in China during 1990–2017: drivers, speciation  
 559 and ozone formation potential, *Atmos. Chem. Phys.*, 19, 8897–8913, 2019.

560 Liu, F., Zhang, Q., Tong, D., Zheng, B., Li, M., Huo, H. and He, K. B.: High-resolution  
 561 inventory of technologies, activities, and emissions of coal-fired power plants in China from  
 562 1990 to 2010, *Atmos. Chem. Phys.*, 15(23), 13299–13317, 2015.

563 Marais, E. A., Jacob, D. J., Jimenez, J. L., Campuzano-Jost, P., Day, D. A., Hu, W., Krechmer, J.,



564 Zhu, L., Kim, P. S., Miller, C. C., Fisher, J. A., Travis, K., Yu, K., Hanisco, T. F., Wolfe, G. M.,  
 565 Arkinson, H. L., Pye, H. O. T., Froyd, K. D., Liao, J. and McNeill, V. F.: Aqueous-phase  
 566 mechanism for secondary organic aerosol formation from isoprene: application to the southeast  
 567 United States and co-benefit of SO<sub>2</sub> emission controls, *Atmos. Chem. Phys.*, 16(3), 1603–1618,  
 568 2016.

569 Matheson, R. R.: 20th- to 21st-Century Technological Challenges in Soft Coatings, *Science*,  
 570 297(5583), 976–979, 2002.

571 McDonald, B. C., Gentner, D. R., Goldstein, A. H. and Harley, R. A.: Long-Term Trends in  
 572 Motor Vehicle Emissions in U.S. Urban Areas, *Environ. Sci. Technol.*, 47(17), 10022–10031,  
 573 2013.

574 McDonald, B. C., Goldstein, A. H. and Harley, R. A.: Long-Term Trends in California Mobile  
 575 Source Emissions and Ambient Concentrations of Black Carbon and Organic Aerosol, *Environ.*  
 576 *Sci. Technol.*, 49(8), 5178–5188, 2015.

577 McDonald, B. C., de Gouw, J. A., Gilman, J. B., Jathar, S. H., Akherati, A., Cappa, C. D.,  
 578 Jimenez, J. L., Lee-Taylor, J., Hayes, P. L., McKeen, S. A., Cui, Y. Y., Kim, S.-W., Gentner, D.  
 579 R., Isaacman-VanWertz, G., Goldstein, A. H., Harley, R. A., Frost, G. J., Roberts, J. M., Ryerson,  
 580 T. B. and Trainer, M.: Volatile chemical products emerging as largest petrochemical source of  
 581 urban organic emissions, *Science*, 359(6377), 760–764, 2018.

582 Mollner, A. K., Valluvadasan, S., Feng, L., Sprague, M. K., Okumura, M., Milligan, D. B., Bloss,  
 583 W. J., Sander, S. P., Martien, P. T., Harley, R. A., McCoy, A. B. and Carter, W. P. L.: Rate of Gas  
 584 Phase Association of Hydroxyl Radical and Nitrogen Dioxide, *Science*, 330(6004), 646–649,  
 585 2010.

586 MOVES: MOVES2014a User Guide., 2015.

587 NEI: National Emissions Inventory (NEI) 2011, version 1, Research Triangle Park., 2015.

588 Pai, S. J., Heald, C. L., Pierce, J. R., Farina, S. C., Marais, E. A., Jimenez, J. L.,  
 589 Campuzano-Jost, P., Nault, B. A., Middlebrook, A. M., Coe, H., Shilling, J. E., Bahreini, R.,  
 590 Dingle, J. H. and Vu, K.: An evaluation of global organic aerosol schemes using airborne  
 591 observations, *Atmos. Chem. Phys.*, 20(5), 2637–2665, 2020.

592 Pierson, W. R., Schorran, D. E., Fujita, E. M., Sagebiel, J. C., Lawson, D. R. and Tanner, R. L.:  
 593 Assessment of Nontailpipe Hydrocarbon Emissions from Motor Vehicles, *J. Air Waste Manage.*  
 594 *Assoc.*, 49(5), 498–519, 1999.

595 Pollack, I. B., Lerner, B. M. and Ryerson, T. B.: Evaluation of ultraviolet light-emitting diodes  
 596 for detection of atmospheric NO<sub>2</sub> by photolysis - chemiluminescence, *J. Atmos. Chem.*, 65(2-3),  
 597 111–125, 2010.

598 Roberts, J. M., Stroud, C. A., Jobson, B. T., Trainer, M., Hereid, D., Williams, E., Fehsenfeld, F.,  
 599 Brune, W., Martinez, M. and Harder, H.: Application of a sequential reaction model to PANs and

600 aldehyde measurements in two urban areas, *Geophys. Res. Lett.*, 28(24), 4583–4586, 2001.

601 Roberts, J. M., Flocke, F., Stroud, C. A., Hereid, D., Williams, E., Fehsenfeld, F., Brune, W.,  
602 Martinez, M. and Harder, H.: Ground-based measurements of peroxy-carboxylic nitric anhydrides  
603 (PANs) during the 1999 Southern Oxidants Study Nashville Intensive, *J. Geophys. Res. D:*  
604 *Atmos.*, 107(D21), 4554, 2002.

605 Rubin, J. I., Kean, A. J., Harley, R. A., Millet, D. B. and Goldstein, A. H.: Temperature  
606 dependence of volatile organic compound evaporative emissions from motor vehicles, *J.*  
607 *Geophys. Res. D: Atmos.*, 111(D3), D03305, 2006.

608 Ryerson, T. B., Huey, L. G., Knapp, K., Neuman, J. A., Parrish, D. D., Sueper, D. T. and  
609 Fehsenfeld, F. C.: Design and initial characterization of an inlet for gas-phase NO<sub>y</sub> measurements  
610 from aircraft, *J. Geophys. Res. D: Atmos.*, 104(D5), 5483–5492, 1999.

611 Ryerson, T. B., Andrews, A. E., Angevine, W. M., Bates, T. S., Brock, C. A., Cairns, B., Cohen,  
612 R. C., Cooper, O. R., de Gouw, J. A., Fehsenfeld, F. C., Ferrare, R. A., Fischer, M. L., Flagan, R.  
613 C., Goldstein, A. H., Hair, J. W., Hardesty, R. M., Hostetler, C. A., Jimenez, J. L., Langford, A.  
614 O., McCauley, E., McKeen, S. A., Molina, L. T., Nenes, A., Oltmans, S. J., Parrish, D. D.,  
615 Pederson, J. R., Pierce, R. B., Prather, K., Quinn, P. K., Seinfeld, J. H., Senff, C. J., Sorooshian,  
616 A., Stutz, J., Surratt, J. D., Trainer, M., Volkamer, R., Williams, E. J. and Wofsy, S. C.: The 2010  
617 California Research at the Nexus of Air Quality and Climate Change (CalNex) field study, *J.*  
618 *Geophys. Res. D: Atmos.*, 118(11), 5830–5866, 2013.

619 Sachse, G. W., Hill, G. F., Wade, L. O. and Perry, M. G.: Fast-Response, High-Precision Carbon  
620 Monoxide Sensor using a Tunable Diode Laser Absorption Technique, *J. Geophys. Res.: Atmos.*,  
621 92(D2), 2071–2081, 1987.

622 Schroder, J. C., Campuzano-Jost, P., Day, D. A., Shah, V., Larson, K., Sommers, J. M., Sullivan,  
623 A. P., Campos, T., Reeves, J. M., Hills, A., Hornbrook, R. S., Blake, N. J., Scheuer, E., Guo, H.,  
624 Fibiger, D. L., McDuffie, E. E., Hayes, P. L., Weber, R. J., Dibb, J. E., Apel, E. C., Jaeglé, L.,  
625 Brown, S. S., Thornton, J. A. and Jimenez, J. L.: Sources and Secondary Production of Organic  
626 Aerosols in the Northeastern US during WINTER, *J. Geophys. Res. D: Atmos.*,  
627 doi:10.1029/2018JD028475, 2018.

628 Simon, H., Beck, L., Bhave, P. V., Divita, F., Hsu, Y., Luecken, D., Mobley, J. D., Pouliot, G. A.,  
629 Reff, A., Sarwar, G. and Strum, M.: The development and uses of EPA's SPECIATE database,  
630 *Atmos. Pollut. Res.*, 1(4), 196–206, 2010.

631 Slusher, D. L., Huey, L. G., Tanner, D. J., Flocke, F. M. and Roberts, J. M.: A thermal  
632 dissociation-chemical ionization mass spectrometry (TD-CIMS) technique for the simultaneous  
633 measurement of peroxyacyl nitrates and dinitrogen pentoxide, *J. Geophys. Res.: Atmos.*,  
634 109(D19), D19315–D19315, 2004.

635 Stutz, J. and Platt, U.: Numerical analysis and estimation of the statistical error of differential  
636 optical absorption spectroscopy measurements with least-squares methods, *Appl. Opt.*, 35(30),



6041, 1996.

Stutz, J. and Platt, U.: Improving long-path differential optical absorption spectroscopy with a quartz-fiber mode mixer, *Appl. Opt.*, 36(6), 1105, 1997.

Travis, K. R., Jacob, D. J., Fisher, J. A., Kim, P. S., Marais, E. A., Zhu, L., Yu, K., Miller, C. C., Yantosca, R. M., Sulprizio, M. P., Thompson, A. M., Wennberg, P. O., Crounse, J. D., St. Clair, J. M., Cohen, R. C., Laughner, J. L., Dibb, J. E., Hall, S. R., Ullmann, K., Wolfe, G. M., Pollack, I. B., Peischl, J., Neuman, J. A. and Zhou, X.: Why do models overestimate surface ozone in the Southeast United States?, *Atmos. Chem. Phys.*, 16(21), 13561–13577, 2016.

Vaughan, A. R., Lee, J. D., Shaw, M. D., Misztal, P. K., Metzger, S., Vieno, M., Davison, B., Karl, T. G., Carpenter, L. J., Lewis, A. C., Purvis, R. M., Goldstein, A. H. and Hewitt, C. N.: VOC emission rates over London and South East England obtained by airborne eddy covariance, *Faraday Discuss.*, 200(0), 599–620, 2017.

Wang, M., Shao, M., Chen, W., Yuan, B., Lu, S., Zhang, Q., Zeng, L. and Wang, Q.: A temporally and spatially resolved validation of emission inventories by measurements of ambient volatile organic compounds in Beijing, China, *Atmos. Chem. Phys.*, 14(12), 5871–5891, 2014.

Warneke, C., McKeen, S. A., de Gouw, J. A., Goldan, P. D., Kuster, W. C., Holloway, J. S., Williams, E. J., Lerner, B. M., Parrish, D. D., Trainer, M., Fehsenfeld, F. C., Kato, S., Atlas, E. L., Baker, A. and Blake, D. R.: Determination of urban volatile organic compound emission ratios and comparison with an emissions database, *J. Geophys. Res. D: Atmos.*, 112(D10), doi:10.1029/2006JD007930, 2007.

Warneke, C., Veres, P., Holloway, J. S., Stutz, J., Tsai, C., Alvarez, S., Rappenglueck, B., Fehsenfeld, F. C., Graus, M., Gilman, J. B. and de Gouw, J. A.: Airborne formaldehyde measurements using PTR-MS: calibration, humidity dependence, inter-comparison and initial results, *Atmos. Meas. Tech.*, 4(10), 2345–2358, 2011.

Warneke, C., de Gouw, J. A., Holloway, J. S., Peischl, J., Ryerson, T. B., Atlas, E., Blake, D., Trainer, M. and Parrish, D. D.: Multiyear trends in volatile organic compounds in Los Angeles, California: Five decades of decreasing emissions, *J. Geophys. Res. D: Atmos.*, 117(D21), D00V17, 2012.

Weibring, P., Richter, D., Walega, J. G., Rippe, L. and Fried, A.: Difference frequency generation spectrometer for simultaneous multispecies detection, *Opt. Express*, 18(26), 27670, 2010.

Weinheimer, A. J., Walega, J. G., Ridley, B. A., Gary, B. L., Blake, D. R., Blake, N. J., Rowland, F. S., Sachse, G. W., Anderson, B. E. and Collins, J. E.: Meridional distributions of  $\text{NO}_x$ ,  $\text{NO}_y$ , and other species in the lower stratosphere and upper troposphere during AASE II, *Geophys. Res. Lett.*, 21(23), 2583–2586, 1994.

Whalley, L. K., Stone, D., Bandy, B., Dunmore, R., Hamilton, J. F., Hopkins, J., Lee, J. D., Lewis, A. C. and Heard, D. E.: Atmospheric OH reactivity in central London: observations, model predictions and estimates of in situ ozone production, *Atmos. Chem. Phys.*, 16(4),

674 2109–2122, 2016.

675 Williams, E. J., Roberts, J. M., Baumann, K., Bertman, S. B., Buhr, S., Norton, R. B. and  
676 Fehsenfeld, F. C.: Variations in NO<sub>y</sub> composition at Idaho Hill, Colorado, J. Geophys. Res. D:  
677 Atmos., 102(D5), 6297–6314, 1997.

678 Williams, J., Roberts, J. M., Bertman, S. B., Stroud, C. A., Fehsenfeld, F. C., Baumann, K., Buhr,  
679 M. P., Knapp, K., Murphy, P. C., Nowick, M. and Williams, E. J.: A method for the airborne  
680 measurement of PAN, PPN, and MPAN, J. Geophys. Res. D: Atmos., 105(D23), 28943–28960,  
681 2000.

682 Young, D. E., Allan, J. D., Williams, P. I., Green, D. C., Flynn, M. J., Harrison, R. M., Yin, J.,  
683 Gallagher, M. W. and Coe, H.: Investigating the annual behaviour of submicron secondary  
684 inorganic and organic aerosols in London, Atmos. Chem. Phys., 15, 6351–6366, 2015.

685 Yuan, B., Hu, W. W., Shao, M., Wang, M., Chen, W. T., Lu, S. H., Zeng, L. M. and Hu, M.: VOC  
686 emissions, evolutions and contributions to SOA formation at a receptor site in eastern China,  
687 Atmos. Chem. Phys., 13(17), 8815–8832, 2013.

688 Zhang, Q., Streets, D. G., Carmichael, G. R., He, K. B., Huo, H., Kannari, A., Klimont, Z., Park,  
689 I. S., Reddy, S., Fu, J. S., Chen, D., Duan, L., Lei, Y., Wang, L. T. and Yao, Z. L.: Asian  
690 emissions in 2006 for the NASA INTEX-B mission, Atmos. Chem. Phys., 9(14), 5131–5153,  
691 2009.

692 Zheng, B., Huo, H., Zhang, Q., Yao, Z. L., Wang, X. T., Yang, X. F., Liu, H. and He, K. B.:  
693 High-resolution mapping of vehicle emissions in China in 2008, Atmos. Chem. Phys., 14(18),  
694 9787–9805, 2014.

695 Zheng, B., Tong, D., Li, M., Liu, F., Hong, C., Geng, G., Li, H., Li, X., Peng, L., Qi, J., Yan, L.,  
696 Zhang, Y., Zhao, H., Zheng, Y., He, K. and Zhang, Q.: Trends in China's anthropogenic  
697 emissions since 2010 as the consequence of clean air actions, Atmos. Chem. Phys., 18(19),  
698 14095–14111, 2018.

699
